# Supplementary material for: Optimizing through-space interaction for singlet fission by using macrocyclic structures
Source: Royal Society of Chemistry journal article supplement (doi:10.1039/d3tc01077e), 2023-01-01
Supplement: d3tc01077e1.pdf [file d3tc01077e1.pdf]

## Supplementary Information

# Optimizing through-space interaction for singlet fission by using macrocyclic structures

Zhangxia Wang, Xuexiao Yang, Haibo Ma\* and Xiaoyu Xie\*

### 1. Calculation details

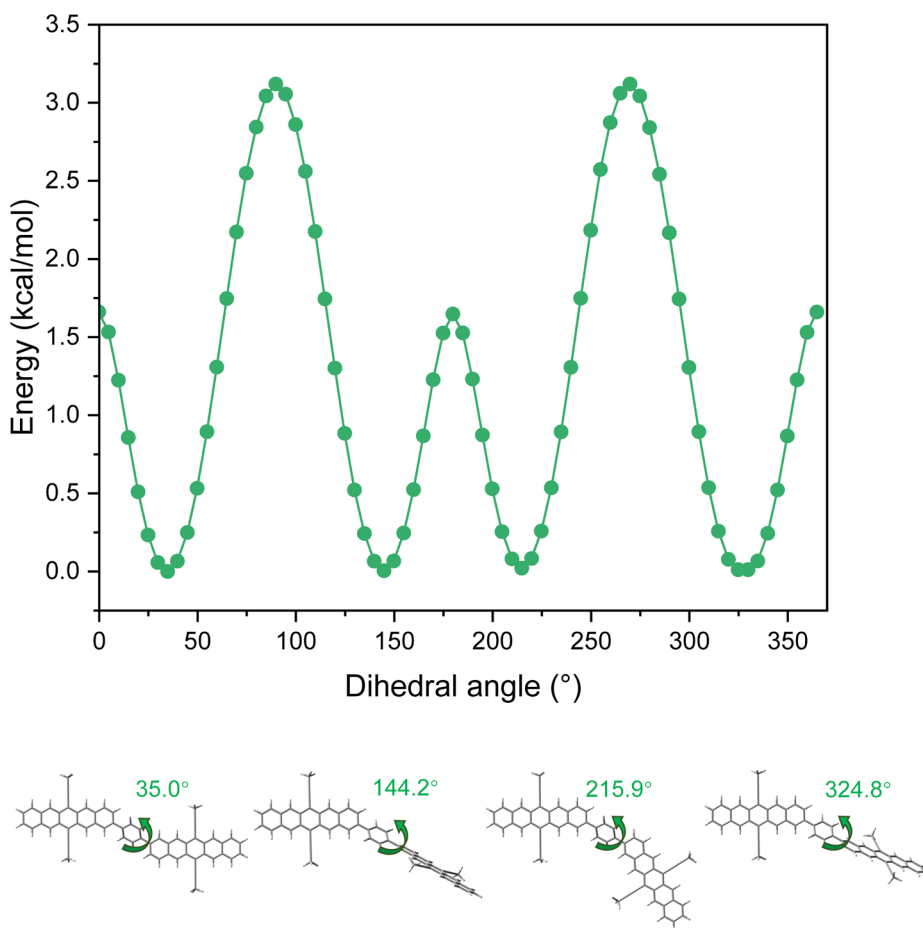

**Figure S1.** The potential energy surface scan curves of BP1 by scanning the dihedral angle in the range of 0-360° in increments of 5° at the B3LYP/6-31G(d) level.

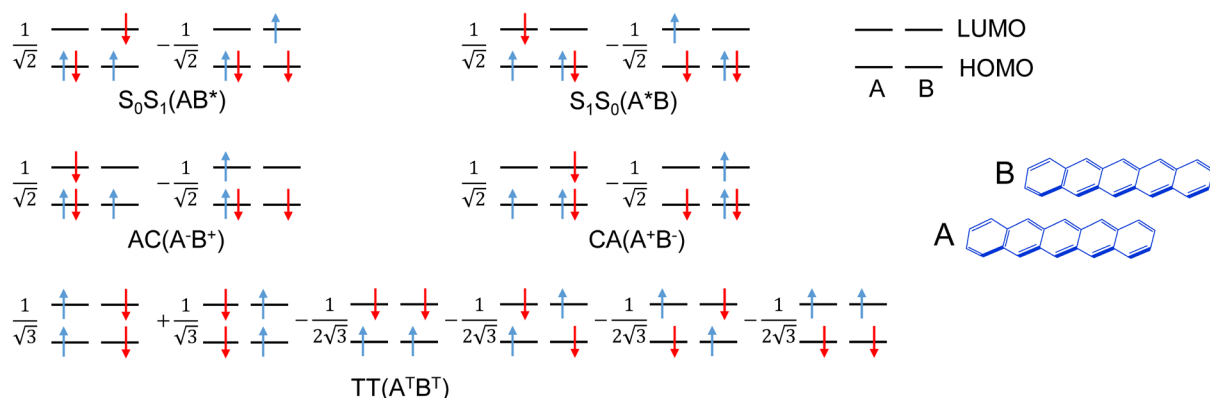

**Figure S2.** The illustration of diabatic states in bipentacene system as configuration state functions for singlet fission.  $S_0S_1/S_1S_0$ : local singlet excited states, CA/AC: charge transfer states and TT: multiexcitonic states, HOMO/LUMO: highest occupied molecular orbital/lowest unoccupied molecular orbital, A/B: two pentacenes.

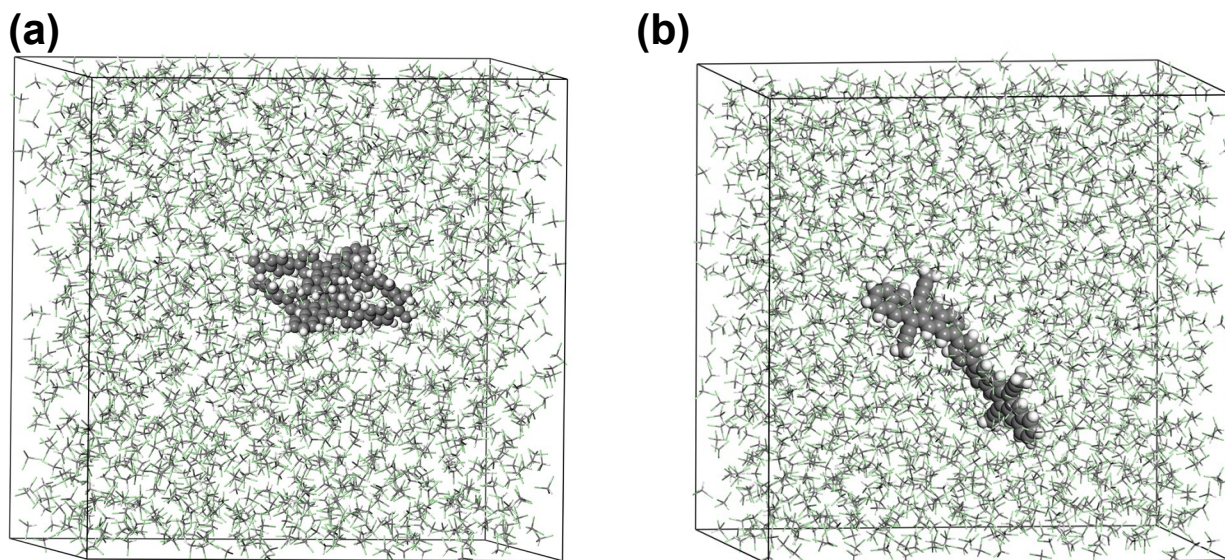

**Figure S3.** The MD models for (a) BPc and (b) BP1 systems with 2000 chloroform molecules.

**Table S1.** Parameter values for evaluating FCWD for singlet fission of BP1 and BPcs.

|                                            | BP1 (TIPS-Pentacene)  |                       |                       | BPc (Pentacene)       |                       |                       |
|--------------------------------------------|-----------------------|-----------------------|-----------------------|-----------------------|-----------------------|-----------------------|
|                                            | $S_1 \rightarrow S_0$ | $S_0 \rightarrow T_1$ | $S_1 \rightarrow T_1$ | $S_1 \rightarrow S_0$ | $S_0 \rightarrow T_1$ | $S_1 \rightarrow T_1$ |
| $E_0$ (cm <sup>-1</sup> )                  | 15553 <sup>1</sup>    | 6936 <sup>2,3</sup>   | 8617                  | 17178 <sup>5</sup>    | 6936 <sup>3,4</sup>   | 10243                 |
| $\hbar\omega$ (cm <sup>-1</sup> )          | 1400                  | 1400                  | 1400                  | 1400                  | 1400                  | 1400                  |
| $fwhm$ (cm <sup>-1</sup> )                 | 800                   | 800                   | 800                   | 800                   | 800                   | 800                   |
| $\lambda$ (cm <sup>-1</sup> ) <sup>a</sup> | 589                   | 1273                  | 284                   | 767                   | 1510                  | 250                   |
| $S$ <sup>a</sup>                           | 0.421                 | 0.909                 | 0.203                 | 0.548                 | 1.079                 | 0.179                 |
| FCWD (eV <sup>-1</sup> )                   |                       | 2.162                 |                       |                       | 0.980                 |                       |

<sup>a</sup> Calculated from DFT and TDDFT-TDA at B3LYP/6-31G\* level.

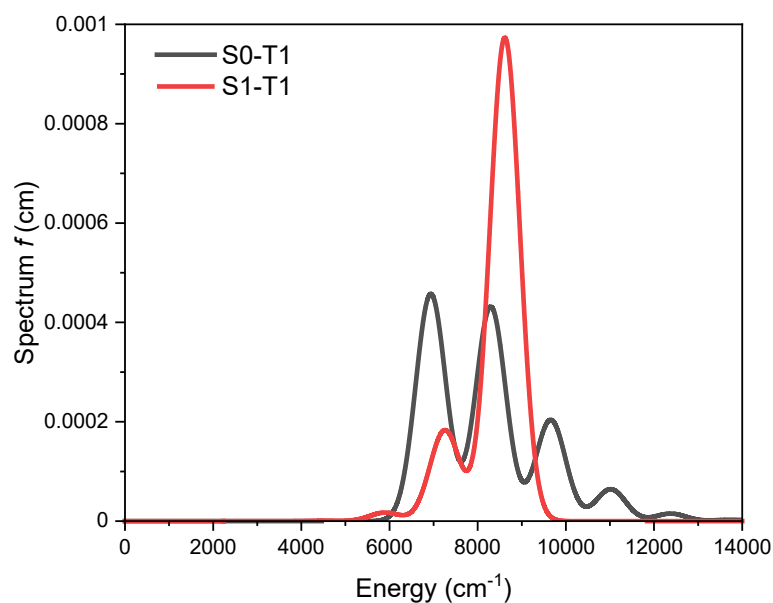

**Figure S4.** The absorption/emission spectrum (in red/black) of  $S_0 \rightarrow T_1/S_1 \rightarrow T_1$  with spectroscopy parameters derived from those of TIPS pentacene to calculate the FCWD value of BP1.

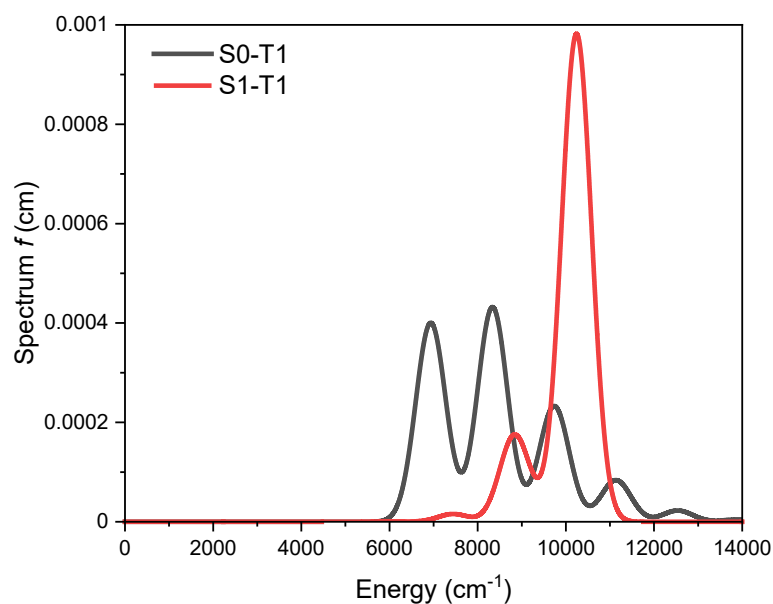

**Figure S5.** The absorption/emission spectrum (in red/black) of  $S_0 \rightarrow T_1/S_1 \rightarrow T_1$  with spectroscopy parameters derived from those of pentacene to calculate the FCWD value of bipentacene macrocycles.

## 2. Results of equilibrium structures

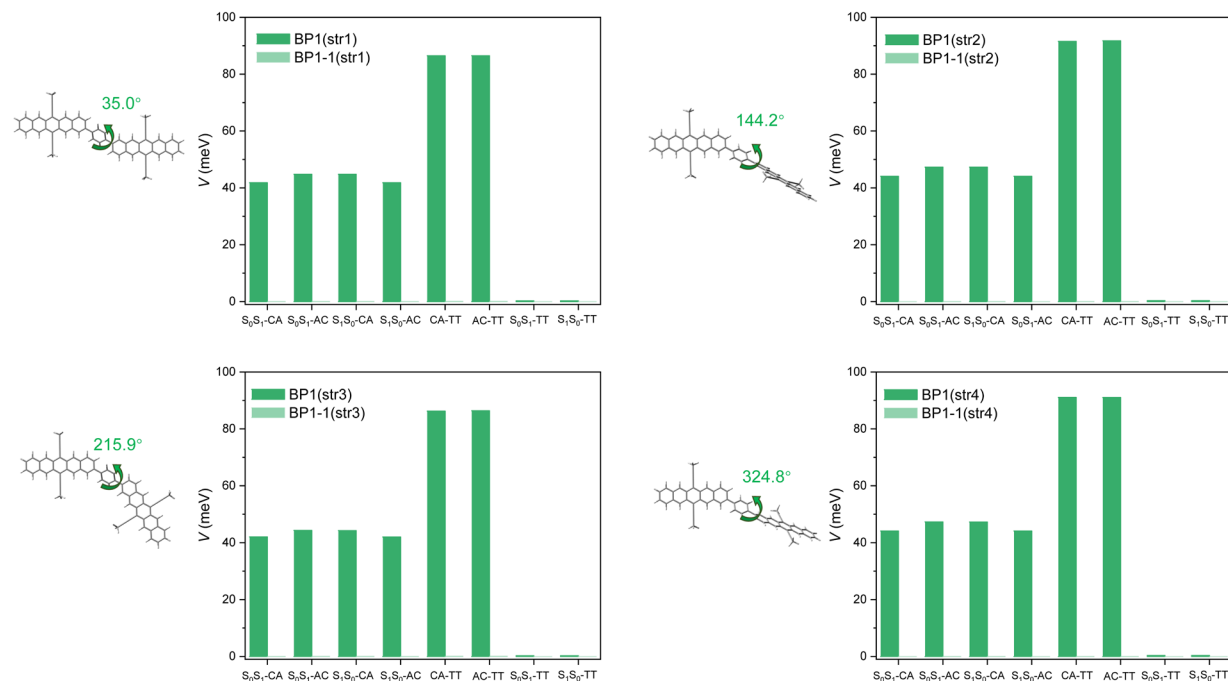

**Figure S6.** Electronic couplings (absolute values) of four equilibrium BP1 structures.

**Table S2.** Electronic Hamiltonian elements of four equilibrium BP1 structures (unit: meV)

|          | $S_0S_1$ | $S_1S_0$ | CA      | AC      | TT      | $S_0S_1$ | $S_1S_0$ | CA      | AC      | TT      |
|----------|----------|----------|---------|---------|---------|----------|----------|---------|---------|---------|
|          | str1     |          |         |         |         | str1-1   |          |         |         |         |
| $S_0S_1$ | 3019.16  | -4.08    | 41.80   | 44.79   | 0.25    | 3041.22  | -6.37    | 0.03    | 0.05    | 0.00    |
| $S_1S_0$ |          | 3019.46  | -44.78  | -41.80  | 0.25    |          | 3041.59  | -0.05   | -0.03   | 0.00    |
| CA       |          |          | 4674.42 | 1.38    | 86.49   |          |          | 4777.24 | 0.00    | 0.08    |
| AC       |          |          |         | 4674.82 | -86.49  |          |          |         | 4777.20 | -0.08   |
| TT       |          |          |         |         | 2439.00 |          |          |         |         | 2344.27 |
|          | str2     |          |         |         |         | str2-1   |          |         |         |         |
| $S_0S_1$ | 3020.16  | -6.69    | -44.07  | 47.31   | -0.33   | 3042.35  | -3.68    | -0.01   | 0.02    | 0.00    |
| $S_1S_0$ |          | 3020.87  | -47.31  | 44.08   | 0.32    |          | 3042.30  | -0.02   | 0.01    | 0.00    |
| CA       |          |          | 4661.99 | -1.55   | 91.51   |          |          | 4765.23 | 0.00    | 0.03    |
| AC       |          |          |         | 4661.63 | 91.72   |          |          |         | 4765.61 | 0.03    |
| TT       |          |          |         |         | 2439.38 |          |          |         |         | 2342.78 |
|          | str3     |          |         |         |         | str3-1   |          |         |         |         |
| $S_0S_1$ | 3020.18  | 13.61    | -42.03  | -44.26  | -0.24   | 3042.53  | 10.34    | -0.03   | -0.04   | 0.00    |
| $S_1S_0$ |          | 3020.90  | 44.22   | 42.02   | -0.24   |          | 3043.03  | 0.04    | 0.03    | 0.00    |
| CA       |          |          | 4652.25 | 1.33    | 86.26   |          |          | 4753.96 | 0.00    | 0.09    |
| AC       |          |          |         | 4652.62 | -86.37  |          |          |         | 4754.44 | -0.09   |
| TT       |          |          |         |         | 2434.09 |          |          |         |         | 2340.49 |
|          | str4     |          |         |         |         | str4-1   |          |         |         |         |
| $S_0S_1$ | 3019.50  | -0.97    | -44.10  | 47.29   | 0.32    | 3041.67  | 1.76     | -0.01   | 0.02    | 0.00    |
| $S_1S_0$ |          | 3019.68  | -47.28  | 44.10   | -0.32   |          | 3041.73  | -0.02   | 0.01    | 0.00    |
| CA       |          |          | 4665.63 | -1.53   | -91.09  |          |          | 4769.18 | 0.00    | -0.02   |
| AC       |          |          |         | 4666.10 | -91.06  |          |          |         | 4770.11 | -0.02   |
| TT       |          |          |         |         | 2439.12 |          |          |         |         | 2343.16 |

**Table S3.** Electronic Hamiltonian elements for equilibrium BPc structure. (unit: meV)

|                               | BPc                           |                               |         |         |         | BPc-1                         |                               |         |         |         |
|-------------------------------|-------------------------------|-------------------------------|---------|---------|---------|-------------------------------|-------------------------------|---------|---------|---------|
|                               | S <sub>0</sub> S <sub>1</sub> | S <sub>1</sub> S <sub>0</sub> | CA      | AC      | TT      | S <sub>0</sub> S <sub>1</sub> | S <sub>1</sub> S <sub>0</sub> | CA      | AC      | TT      |
| S <sub>0</sub> S <sub>1</sub> | 3160.63                       | 142.52                        | 68.25   | -82.13  | 0.00    | 3212.37                       | 136.18                        | 60.96   | -87.01  | 0.00    |
| S <sub>1</sub> S <sub>0</sub> |                               | 3160.64                       | 82.13   | -68.25  | 0.00    |                               | 3212.53                       | 87.00   | -60.96  | 0.00    |
| CA                            |                               |                               | 3591.95 | 1.03    | 0.02    |                               |                               | 3658.15 | 1.28    | 0.01    |
| AC                            |                               |                               |         | 3592.03 | 0.01    |                               |                               |         | 3658.15 | -0.02   |
| TT                            |                               |                               |         |         | 2821.06 |                               |                               |         |         | 2884.67 |

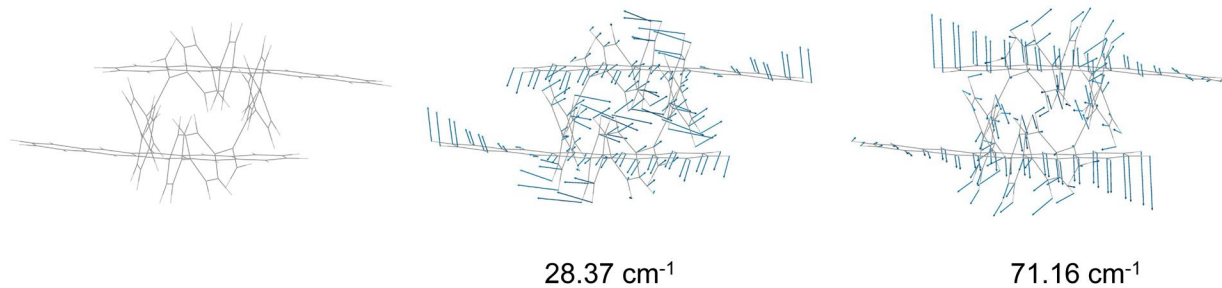

**Figure S7.** Two low-frequency modes of BPc influence the distance between two pentacene units.

### 3. Decomposition of electronic coupling

The definitions of five diabatic states are shown in Figure S2. Equations 1-8 provide the explicit expressions of the electronic couplings between these states.

$$\langle S_0 S_1 | \hat{H} | CA \rangle = -F_{h_A h_B} - g_{h_A h_B h_A h_A} - g_{h_A h_B h_B h_B} - g_{h_A h_B l_B l_B} + 2g_{h_A l_B l_B h_B} \quad (1)$$

$$\langle S_0 S_1 | \hat{H} | AC \rangle = F_{l_B l_A} + 2g_{l_B l_A h_A h_A} + g_{l_B l_A h_B h_B} - g_{l_B h_A h_A l_A} + g_{h_B l_A l_B h_B} \quad (2)$$

$$\langle S_1 S_0 | \hat{H} | CA \rangle = F_{l_A l_B} + 2g_{l_A l_B h_B h_B} + g_{l_A l_B h_A h_A} - g_{l_A h_B h_B l_B} + g_{h_A l_B l_A h_A} \quad (3)$$

$$\langle S_1 S_0 | \hat{H} | AC \rangle = F_{h_B h_A} + g_{h_B h_A h_A h_A} + g_{h_B h_A l_A l_A} + g_{h_B h_A h_B h_B} - 2g_{h_B l_A l_A h_A} \quad (4)$$

$$\langle S_0 S_1 | \hat{H} | TT \rangle = -\sqrt{3/2} g_{h_A l_B l_B l_A} + \sqrt{3/2} g_{h_A h_B h_B l_A} \quad (5)$$

$$\langle S_1 S_0 | \hat{H} | TT \rangle = \sqrt{3/2} g_{h_B l_A l_A l_B} - \sqrt{3/2} g_{h_B h_A h_A l_B} \quad (6)$$

$$\langle CA | \hat{H} | TT \rangle = \sqrt{3/2} (F_{h_B l_A} + g_{h_B l_A h_A h_A} + g_{h_B l_A h_B h_B} + g_{h_B l_A l_B l_B} - g_{h_B h_A h_A l_A}) \quad (7)$$

$$\langle AC | \hat{H} | TT \rangle = \sqrt{3/2} (F_{h_A l_B} + g_{h_A l_B h_A h_A} + g_{h_A l_B l_A l_A} + g_{h_A l_B h_B h_B} - g_{h_A h_B h_B l_B}) \quad (8)$$

Here,  $h_{A/B}$  stands for HOMO of A/B molecule, and  $l_{A/B}$  stands for LUMO of A/B molecule. The Fock element ( $F_{ij}$ ) is given by:

$$F_{ij} = h_{ij} + \sum_{a \in \text{occ}} (2g_{iaja} - g_{iaaj}) = h_{ij} + 2J - K$$

$$h_{ij} = \int \Phi_i^*(\mathbf{x}) \left( -\frac{1}{2} \nabla^2 - \sum_I \frac{Z_I}{r_I} \right) \Phi_j(\mathbf{x}) d\mathbf{x}$$

$$g_{ijkl} = \iint \frac{\Phi_i^*(\mathbf{x}_1) \Phi_k^*(\mathbf{x}_2) \Phi_j(\mathbf{x}_1) \Phi_l(\mathbf{x}_2)}{r_{12}} d\mathbf{x}_1 d\mathbf{x}_2$$

Here,  $Z_I$  is the nuclear charge,  $r_I$  is the electron-nuclear separation,  $r_{12}$  is the electron-electron separation.  $2J$  is the Coulomb term,  $K$  is the exchange term, and  $h_{ij}$  is one-electron integral. Generally, the couplings can be expressed as  $h_{ij} + 2J - K + g$ , and the two-electron term ( $g$ ) is the sum of two-electron integrals of HOMO/LUMO. For example, the two-electron term is  $-g_{h_A h_B h_A h_A} - g_{h_A h_B h_B h_B} - g_{h_A h_B l_B l_B} + 2g_{h_A l_B l_B h_B}$  for  $\langle S_0 S_1 | \hat{H} | CA \rangle$ .

In order to explore the influence of the linker on the couplings, we localize occupied orbitals for BP1 and BPc to analyze the contribution of the linker to Coulomb and exchange interactions in the Fock operator term.

$$\begin{aligned} F_{ij} &= h_{ij} + \sum_{a \in \text{linker}} (2g_{iaja} - g_{iaaj}) + \sum_{b \in \text{core}} (2g_{ibjb} - g_{ibbj}) \\ &= h_{ij} + 2J_{ij}^1 - K_{ij}^1 + 2J_{ij}^c - K_{ij}^c \end{aligned}$$

Where  $2J_{ij}^1$  is the Coulomb term of occupied linker orbitals, and  $-K_{ij}^1$  is the exchange terms of occupied linker orbitals. All the data for four equilibrium structures and 10 molecular dynamics snapshots of BP1 are listed in Table S1-S14, and those of BPc are listed in Table S15-S25.

**Table S4.** Decomposition of electronic coupling of BP1 at equilibrium structure (str1). (meV)

|                                          |       | <i>F</i> |                     |                 |        | <i>g</i> | <i>V</i> |
|------------------------------------------|-------|----------|---------------------|-----------------|--------|----------|----------|
|                                          |       | <i>h</i> | $2J$ ( $2J^l$ )     | $-K$ ( $-K^l$ ) | total  |          |          |
| $\langle S_0 S_1   \hat{H}   CA \rangle$ | BP1   | -1843.99 | 1886.04 (1552.21)   | -2.42 (-6.75)   | 44.47  | -2.67    | 41.80    |
|                                          | BP1-1 | -1.41    | 1.47 (-)            | 0.03 (-)        | 0.02   | 0.01     | 0.03     |
| $\langle S_0 S_1   \hat{H}   AC \rangle$ | BP1   | 1063.60  | -1018.62 (-1270.11) | 4.98 (5.29)     | 40.01  | 4.78     | 44.79    |
|                                          | BP1-1 | -0.93    | 1.02 (-)            | 0.05 (-)        | 0.04   | 0.01     | 0.05     |
| $\langle S_1 S_0   \hat{H}   CA \rangle$ | BP1   | -1063.60 | 1018.62(1270.11)    | -4.98 (-5.29)   | -40.01 | -4.78    | -44.78   |
|                                          | BP1-1 | 0.93     | -1.02 (-)           | -0.05 (-)       | -0.04  | -0.01    | -0.05    |
| $\langle S_1 S_0   \hat{H}   AC \rangle$ | BP1   | 1843.99  | -1886.04(1552.21)   | 2.42 (6.75)     | -44.47 | 2.68     | -41.80   |
|                                          | BP1-1 | 1.41     | -1.47 (-)           | -0.03 (-)       | -0.04  | -0.01    | -0.03    |
| $\langle S_0 S_1   \hat{H}   TT \rangle$ | BP1   | -        | -                   | -               | -      | 0.25     | 0.25     |
|                                          | BP1-1 | -        | -                   | -               | -      | 0.00     | 0.00     |
| $\langle S_1 S_0   \hat{H}   TT \rangle$ | BP1   | -        | -                   | -               | -      | 0.25     | 0.25     |
|                                          | BP1-1 | -        | -                   | -               | -      | 0.00     | 0.00     |
| $\langle CA   \hat{H}   TT \rangle$      | BP1   | -412.41  | 456.30 (204.52)     | 13.65 (-6.33)   | 30.23  | 56.25    | 86.49    |
|                                          | BP1-1 | -1.40    | 1.47 (-)            | 0.06 (-)        | 0.02   | 0.07     | 0.08     |
| $\langle AC   \hat{H}   TT \rangle$      | BP1   | 412.48   | -456.35 (204.69)    | -13.63 (6.30)   | -30.24 | -56.25   | -86.49   |
|                                          | BP1-1 | 1.40     | -1.47 (-)           | -0.06 (-)       | -0.02  | -0.07    | -0.08    |

**Table S5.** Energies of five diabatic states of BP1 at equilibrium structure (str1) in eV.

|       | $E_{S_0 S_1}$ | $E_{S_1 S_0}$ | $E_{CA}$ | $E_{AC}$ | $E_{TT}$ |
|-------|---------------|---------------|----------|----------|----------|
| BP1   | 3.02          | 3.02          | 4.67     | 4.67     | 2.44     |
| BP1-1 | 3.04          | 3.04          | 4.78     | 4.78     | 2.34     |

**Table S6.** Decomposition of electronic coupling of BP1 at equilibrium structure (str2). (meV)

|                                    |       | <i>F</i> |                         |                         |        | <i>g</i> | <i>V</i> |
|------------------------------------|-------|----------|-------------------------|-------------------------|--------|----------|----------|
|                                    |       | <i>h</i> | $2J$ ( $2J^{\dagger}$ ) | $-K$ ( $-K^{\dagger}$ ) | total  |          |          |
| $\langle S_0S_1 \hat{H} CA\rangle$ | BP1   | 2018.76  | -2062.98 (-1631.43)     | 1.49 (-13.31)           | -45.72 | 1.64     | -44.07   |
|                                    | BP1-1 | 0.50     | -0.52 (-)               | -0.01 (-)               | -0.01  | 0.00     | -0.01    |
| $\langle S_0S_1 \hat{H} AC\rangle$ | BP1   | 1125.51  | -1074.62 (-1282.20)     | 7.31 (-32.66)           | 43.58  | 3.73     | 47.31    |
|                                    | BP1-1 | -0.36    | 0.39 (-)                | 0.02 (-)                | 0.01   | 0.00     | 0.02     |
| $\langle S_1S_0 \hat{H} CA\rangle$ | BP1   | -1125.51 | 1074.62 (1282.20)       | -7.31 (32.66)           | -43.58 | -3.73    | -47.31   |
|                                    | BP1-1 | 0.36     | -0.39 (-)               | -0.02 (-)               | -0.01  | 0.00     | -0.02    |
| $\langle S_1S_0 \hat{H} AC\rangle$ | BP1   | -2018.76 | 2062.98 (1631.43)       | -1.49 (13.31)           | 45.72  | -1.64    | 44.08    |
|                                    | BP1-1 | -0.50    | 0.52 (-)                | 0.01 (-)                | 0.01   | 0.00     | 0.01     |
| $\langle S_0S_1 \hat{H} TT\rangle$ | BP1   | -        | -                       | -                       | -      | -0.33    | -0.33    |
|                                    | BP1-1 | -        | -                       | -                       | -      | 0.00     | 0.00     |
| $\langle S_1S_0 \hat{H} TT\rangle$ | BP1   | -        | -                       | -                       | -      | 0.32     | 0.32     |
|                                    | BP1-1 | -        | -                       | -                       | -      | 0.00     | 0.00     |
| $\langle CA \hat{H} TT\rangle$     | BP1   | -488.56  | 537.99 (239.59)         | 17.81 (-11.67)          | 31.63  | 59.88    | 91.51    |
|                                    | BP1-1 | -0.52    | 0.54 (-)                | 0.02 (-)                | 0.01   | 0.02     | 0.03     |
| $\langle AC \hat{H} TT\rangle$     | BP1   | -492.50  | 542.02 (227.67)         | 17.81 (11.60)           | 31.71  | 60.02    | 91.72    |
|                                    | BP1-1 | -0.55    | 0.57 (-)                | 0.02 (-)                | 0.01   | 0.02     | 0.03     |

**Table S7.** Energies of five diabatic states of BP1 at equilibrium structure (str2). (eV)

|       | $E_{S_0S_1}$ | $E_{S_1S_0}$ | $E_{CA}$ | $E_{AC}$ | $E_{TT}$ |
|-------|--------------|--------------|----------|----------|----------|
| BP1   | 3.02         | 3.02         | 4.66     | 4.66     | 2.44     |
| BP1-1 | 3.04         | 3.04         | 4.77     | 4.77     | 2.34     |



**Table S8.** Decomposition of electronic coupling of BP1 at equilibrium structure (str3). (meV)\

|                                          |       | <i>F</i> |                       |                       |        | <i>g</i> | <i>V</i> |
|------------------------------------------|-------|----------|-----------------------|-----------------------|--------|----------|----------|
|                                          |       | <i>h</i> | $2J$ ( $2J^\dagger$ ) | $-K$ ( $-K^\dagger$ ) | total  |          |          |
| $\langle S_0 S_1   \hat{H}   CA \rangle$ | BP1   | 1934.99  | -1975.38 (-1423.47)   | 2.97 (4.43)           | -43.36 | 1.33     | -42.03   |
|                                          | BP1-1 | 1.57     | -1.63 (-)             | -0.03 (-)             | -0.02  | -0.01    | -0.03    |
| $\langle S_0 S_1   \hat{H}   AC \rangle$ | BP1   | -1172.68 | 1128.14 (1138.15)     | -3.73 (-4.91)         | -40.81 | -3.45    | -44.26   |
|                                          | BP1-1 | 0.62     | -0.70 (-)             | -0.05 (-)             | -0.04  | -0.01    | -0.04    |
| $\langle S_1 S_0   \hat{H}   CA \rangle$ | BP1   | 1172.68  | -1128.14 (-1138.15)   | 3.73 (4.91)           | 40.81  | 3.42     | 44.22    |
|                                          | BP1-1 | -0.62    | 0.70 (-)              | 0.05 (-)              | 0.04   | 0.01     | 0.04     |
| $\langle S_1 S_0   \hat{H}   AC \rangle$ | BP1   | -1934.99 | 1975.38 (1423.47)     | -2.97 (-4.43)         | 43.36  | -1.34    | 42.02    |
|                                          | BP1-1 | -1.57    | 1.63 (-)              | 0.03 (-)              | 0.02   | 0.01     | 0.03     |
| $\langle S_0 S_1   \hat{H}   TT \rangle$ | BP1   | -        | -                     | -                     | -      | -0.24    | -0.24    |
|                                          | BP1-1 | -        | -                     | -                     | -      | 0.00     | 0.00     |
| $\langle S_1 S_0   \hat{H}   TT \rangle$ | BP1   | -        | -                     | -                     | -      | -0.24    | -0.24    |
|                                          | BP1-1 | -        | -                     | -                     | -      | 0.00     | 0.00     |
| $\langle CA   \hat{H}   TT \rangle$      | BP1   | -436.06  | 480.60 (199.46)       | 14.89 (-6.67)         | 29.65  | 56.61    | 86.26    |
|                                          | BP1-1 | -1.49    | 1.57 (-)              | 0.06 (-)              | 0.02   | 0.07     | 0.09     |
| $\langle AC   \hat{H}   TT \rangle$      | BP1   | 437.39   | -481.98 (-176.79)     | -14.88 (7.01)         | -29.71 | -56.67   | -86.37   |
|                                          | BP1-1 | 1.49     | -1.57 (-)             | -0.06 (-)             | -0.02  | -0.07    | -0.09    |

**Table S9.** Energies of five diabatic states of BP1 at equilibrium structure (str3). (eV)

|       | $E_{S_0 S_1}$ | $E_{S_1 S_0}$ | $E_{CA}$ | $E_{AC}$ | $E_{TT}$ |
|-------|---------------|---------------|----------|----------|----------|
| BP1   | 3.02          | 3.02          | 4.66     | 4.66     | 2.44     |
| BP1-1 | 3.04          | 3.04          | 4.77     | 4.77     | 2.34     |

**Table S10.** Decomposition of electronic coupling of BP1 at equilibrium structure (str4). (meV)

|                                          |       | <i>F</i> |                            |                            |        | <i>g</i> | <i>V</i> |
|------------------------------------------|-------|----------|----------------------------|----------------------------|--------|----------|----------|
|                                          |       | <i>h</i> | $2J$ ( $2J^{\downarrow}$ ) | $-K$ ( $-K^{\downarrow}$ ) | total  |          |          |
| $\langle S_0 S_1   \hat{H}   CA \rangle$ | BP1   | 1982.80  | -2027.55 (-1556.52)        | 1.45 (4.30)                | -46.20 | 2.10     | -44.10   |
|                                          | BP1-1 | 0.51     | -0.53 (-)                  | -0.01 (-)                  | -0.01  | 0.00     | -0.01    |
| $\langle S_0 S_1   \hat{H}   AC \rangle$ | BP1   | 1111.69  | -1060.84 (-1240.82)        | 7.66 (0.04)                | 43.19  | 4.10     | 47.29    |
|                                          | BP1-1 | -0.39    | 0.42 (-)                   | 0.02 (-)                   | 0.01   | 0.01     | 0.02     |
| $\langle S_1 S_0   \hat{H}   CA \rangle$ | BP1   | -1111.69 | 1060.84 (1240.82)          | -7.66 (-0.04)              | -43.19 | -4.09    | -47.28   |
|                                          | BP1-1 | 0.39     | -0.42 (-)                  | -0.02 (-)                  | -0.01  | -0.01    | -0.02    |
| $\langle S_1 S_0   \hat{H}   AC \rangle$ | BP1   | -1982.80 | 2027.55 (1556.52)          | -1.45 (-4.30)              | 46.20  | -2.10    | 44.10    |
|                                          | BP1-1 | -0.51    | 0.53 (-)                   | 0.01 (-)                   | 0.01   | 0.00     | 0.01     |
| $\langle S_0 S_1   \hat{H}   TT \rangle$ | BP1   | -        | -                          | -                          | -      | 0.32     | 0.32     |
|                                          | BP1-1 | -        | -                          | -                          | -      | 0.00     | 0.00     |
| $\langle S_1 S_0   \hat{H}   TT \rangle$ | BP1   | -        | -                          | -                          | -      | -0.32    | -0.32    |
|                                          | BP1-1 | -        | -                          | -                          | -      | 0.00     | 0.00     |
| $\langle CA   \hat{H}   TT \rangle$      | BP1   | 494.67   | -543.76 (-226.84)          | -17.53 (8.18)              | -31.56 | -59.53   | -91.09   |
|                                          | BP1-1 | 0.44     | -0.46 (-)                  | -0.02 (-)                  | 0.00   | -0.02    | -0.02    |
| $\langle AC   \hat{H}   TT \rangle$      | BP1   | 494.33   | -543.41 (-231.32)          | -17.51 (8.17)              | -31.56 | -59.50   | -91.06   |
|                                          | BP1-1 | 0.44     | -0.47 (-)                  | -0.02 (-)                  | 0.00   | -0.02    | -0.02    |

**Table S11.** Energies of five diabatic states of BP1 at equilibrium structure (str4). (eV)

|       | $E_{S_0 S_1}$ | $E_{S_1 S_0}$ | $E_{CA}$ | $E_{AC}$ | $E_{TT}$ |
|-------|---------------|---------------|----------|----------|----------|
| BP1   | 3.02          | 3.02          | 4.67     | 4.67     | 2.44     |
| BP1-1 | 3.04          | 3.04          | 4.77     | 4.77     | 2.34     |

**Table S12.** Decomposition of electronic coupling of BPc at equilibrium structure. (meV)

|                                          |       | <i>F</i> |                            |                            |         | <i>g</i> | <i>V</i> |
|------------------------------------------|-------|----------|----------------------------|----------------------------|---------|----------|----------|
|                                          |       | <i>h</i> | <i>2J (2J<sup>l</sup>)</i> | <i>-K (-K<sup>l</sup>)</i> | total   |          |          |
| $\langle S_0 S_1   \hat{H}   CA \rangle$ | BPc   | -1832.99 | 1659.84 (871.80)           | 73.07 (25.68)              | -100.08 | 31.83    | -68.25   |
|                                          | BPc-1 | -452.83  | 295.74 (-)                 | 65.88 (-)                  | -91.21  | 30.25    | -60.96   |
| $\langle S_0 S_1   \hat{H}   AC \rangle$ | BPc   | -635.47  | 512.03 (348.00)            | 40.87 (-0.31)              | -82.57  | 0.44     | -82.13   |
|                                          | BPc-1 | 6.87     | -131.64 (-)                | 43.66 (-)                  | -81.11  | -5.90    | -87.01   |
| $\langle S_1 S_0   \hat{H}   CA \rangle$ | BPc   | -635.47  | 512.03 (348.00)            | 40.87 (-0.31)              | -82.57  | 0.44     | -82.13   |
|                                          | BPc-1 | 6.87     | -131.64 (-)                | 43.66 (-)                  | -81.11  | -5.90    | -87.00   |
| $\langle S_1 S_0   \hat{H}   AC \rangle$ | BPc   | 1832.99  | -1659.84 (-871.80)         | -73.07 (-25.68)            | 100.08  | -31.83   | 68.25    |
|                                          | BPc-1 | 452.83   | -295.74 (-)                | -65.88 (-)                 | 91.21   | -30.25   | 60.96    |
| $\langle S_0 S_1   \hat{H}   TT \rangle$ | BPc   | -        | -                          | -                          | -       | 0.00     | 0.00     |
|                                          | BPc-1 | -        | -                          | -                          | -       | 0.00     | 0.00     |
| $\langle S_1 S_0   \hat{H}   TT \rangle$ | BPc   | -        | -                          | -                          | -       | 0.00     | 0.00     |
|                                          | BPc-1 | -        | -                          | -                          | -       | 0.00     | 0.00     |
| $\langle CA   \hat{H}   TT \rangle$      | BPc   | 0.63     | -0.60 (-0.22)              | -0.02 (-0.01)              | 0.01    | 0.01     | 0.02     |
|                                          | BPc-1 | 0.29     | -0.26 (-)                  | -0.02 (-)                  | 0.01    | 0.00     | 0.01     |
| $\langle AC   \hat{H}   TT \rangle$      | BPc   | 0.99     | -0.98 (-0.29)              | 0.00 (-0.01)               | 0.01    | -0.02    | -0.01    |
|                                          | BPc-1 | 0.22     | -0.18 (-)                  | -0.03 (-)                  | 0.01    | 0.01     | 0.02     |

**Table S13.** Energies of five diabatic states of BPc at equilibrium structure. (eV)

|       | $E_{S_0 S_1}$ | $E_{S_1 S_0}$ | $E_{CA}$ | $E_{AC}$ | $E_{TT}$ |
|-------|---------------|---------------|----------|----------|----------|
| BPc   | 3.16          | 3.16          | 3.59     | 3.59     | 2.82     |
| BPc-1 | 3.21          | 3.21          | 3.66     | 3.66     | 2.88     |

**Table S14.** Decomposition of electronic coupling of BPc at 0.5 ns in MD simulation. (meV)

|                                          |       | <i>F</i> |                            |                            |        | <i>g</i> | <i>V</i> |
|------------------------------------------|-------|----------|----------------------------|----------------------------|--------|----------|----------|
|                                          |       | <i>h</i> | <i>2J (2J<sup>l</sup>)</i> | <i>-K (-K<sup>l</sup>)</i> | total  |          |          |
| $\langle S_0 S_1   \hat{H}   CA \rangle$ | BPc   | -1146.91 | 1264.58 (515.29)           | -50.78 (-11.04)            | 66.89  | 7.24     | 74.12    |
|                                          | BPc-1 | -1162.40 | 1285.76 (-)                | -53.85 (-)                 | 69.51  | 13.87    | 83.38    |
| $\langle S_0 S_1   \hat{H}   AC \rangle$ | BPc   | -212.40  | 339.63 (368.60)            | -53.47 (-15.88)            | 73.76  | 12.86    | 86.62    |
|                                          | BPc-1 | 95.05    | 39.53 (-)                  | -53.25 (-)                 | 81.33  | 9.22     | 90.55    |
| $\langle S_1 S_0   \hat{H}   CA \rangle$ | BPc   | -212.40  | 339.63 (368.60)            | -53.47 (-15.88)            | 73.76  | 3.28     | 77.04    |
|                                          | BPc-1 | 95.05    | 39.53 (-)                  | -53.25 (-)                 | 81.33  | -1.35    | 79.98    |
| $\langle S_1 S_0   \hat{H}   AC \rangle$ | BPc   | 1146.91  | -1264.58 (-515.29)         | 50.78 (11.04)              | -66.89 | -5.82    | -72.70   |
|                                          | BPc-1 | 1162.40  | -1285.76 (-)               | 53.85 (-)                  | -69.51 | -12.74   | -82.25   |
| $\langle S_0 S_1   \hat{H}   TT \rangle$ | BPc   | -        | -                          | -                          | -      | -0.25    | -0.25    |
|                                          | BPc-1 | -        | -                          | -                          | -      | -0.28    | -0.28    |
| $\langle S_1 S_0   \hat{H}   TT \rangle$ | BPc   | -        | -                          | -                          | -      | -0.09    | -0.09    |
|                                          | BPc-1 | -        | -                          | -                          | -      | -0.12    | -0.12    |
| $\langle CA   \hat{H}   TT \rangle$      | BPc   | -722.57  | 711.74 (420.01)            | 6.52 (-2.01)               | -4.31  | 9.64     | 5.34     |
|                                          | BPc-1 | -320.31  | 310.10 (-)                 | 6.53 (-)                   | -3.68  | 9.91     | 6.22     |
| $\langle AC   \hat{H}   TT \rangle$      | BPc   | 882.05   | -871.66 (-537.00)          | -3.25 (1.19)               | 7.14   | -4.98    | 2.15     |
|                                          | BPc-1 | 451.62   | -440.59 (-)                | -3.10 (-)                  | 7.93   | -5.96    | 1.97     |

**Table S15.** Energies of five diabatic states of BPc at 0.5 ns in MD simulation. (eV)

|       | $E_{S_0 S_1}$ | $E_{S_1 S_0}$ | $E_{CA}$ | $E_{AC}$ | $E_{TT}$ |
|-------|---------------|---------------|----------|----------|----------|
| BPc   | 2.72          | 2.91          | 3.06     | 3.23     | 1.57     |
| BPc-1 | 2.78          | 2.98          | 3.13     | 3.28     | 1.64     |

**Table S16.** Decomposition of electronic coupling of BPc at 1.0 ns in MD simulation. (meV)

|                                          |       | $F$      |                    |                 |         | $g$    | $V$     |
|------------------------------------------|-------|----------|--------------------|-----------------|---------|--------|---------|
|                                          |       | $h$      | $2J (2J^l)$        | $-K (-K^l)$     | total   |        |         |
| $\langle S_0 S_1   \hat{H}   CA \rangle$ | BPc   | -947.68  | 1137.62 (219.52)   | -70.09 (-1.45)  | 119.85  | -2.76  | 117.09  |
|                                          | BPc-1 | -1075.03 | 1279.86 (-)        | -77.57 (-)      | 127.26  | 4.04   | 131.30  |
| $\langle S_0 S_1   \hat{H}   AC \rangle$ | BPc   | 1490.20  | -1341.48 (-528.23) | -57.82 (-21.35) | 90.9    | -7.46  | 83.44   |
|                                          | BPc-1 | 950.67   | -785.94 (-)        | -58.23 (-)      | 106.5   | -14.38 | 92.12   |
| $\langle S_1 S_0   \hat{H}   CA \rangle$ | BPc   | 1490.20  | -1341.48 (-528.23) | -57.82 (-21.35) | 90.9    | -9.23  | 81.67   |
|                                          | BPc-1 | 950.67   | -785.94 (-)        | -58.23 (-)      | 106.5   | -15.31 | 91.19   |
| $\langle S_1 S_0   \hat{H}   AC \rangle$ | BPc   | 947.68   | -1137.62 (-219.52) | 70.09 (1.45)    | -119.85 | -5.80  | -125.65 |
|                                          | BPc-1 | 1075.03  | -1279.86 (-)       | 77.57 (-)       | -127.26 | -13.88 | -141.14 |
| $\langle S_0 S_1   \hat{H}   TT \rangle$ | BPc   | -        | -                  | -               | -       | -0.30  | -0.30   |
|                                          | BPc-1 | -        | -                  | -               | -       | -0.21  | -0.21   |
| $\langle S_1 S_0   \hat{H}   TT \rangle$ | BPc   | -        | -                  | -               | -       | 0.53   | 0.53    |
|                                          | BPc-1 | -        | -                  | -               | -       | 0.51   | 0.51    |
| $\langle CA   \hat{H}   TT \rangle$      | BPc   | 1234.42  | -1257.02 (-562.69) | 19.98 (-0.17)   | -2.62   | -48.62 | -51.24  |
|                                          | BPc-1 | 670.90   | -699.73 (-)        | 23.40 (-)       | -5.43   | -54.18 | -59.61  |
| $\langle AC   \hat{H}   TT \rangle$      | BPc   | 132.25   | -118.89 (-379.27)  | -13.79 (5.32)   | -0.43   | 10.02  | 9.59    |
|                                          | BPc-1 | -243.17  | 265.76 (-)         | -20.08 (-)      | 2.51    | 14.29  | 16.80   |

**Table S17.** Energies of five diabatic states of BPc at 1.0 ns in MD simulation. (eV)

|       | $E_{S_0 S_1}$ | $E_{S_1 S_0}$ | $E_{CA}$ | $E_{AC}$ | $E_{TT}$ |
|-------|---------------|---------------|----------|----------|----------|
| BPc   | 2.74          | 2.70          | 2.83     | 2.97     | 1.43     |
| BPc-1 | 2.81          | 2.78          | 2.91     | 3.03     | 1.52     |

**Table S18.** Decomposition of electronic coupling of BPc at 1.5 ns in MD simulation. (meV)

|                                          |       | <i>F</i> |                     |                   |        | <i>g</i> | <i>V</i> |
|------------------------------------------|-------|----------|---------------------|-------------------|--------|----------|----------|
|                                          |       | <i>h</i> | $2J (2J^\dagger)$   | $-K (-K^\dagger)$ | total  |          |          |
| $\langle S_0 S_1   \hat{H}   CA \rangle$ | BPc   | 1434.71  | -1375.42 (-1339.64) | -15.64 (3.05)     | 43.65  | -21.77   | 21.88    |
|                                          | BPc-1 | 168.78   | -111.46 (-)         | -17.36 (-)        | 39.96  | -20.58   | 19.37    |
| $\langle S_0 S_1   \hat{H}   AC \rangle$ | BPc   | -373.19  | 271.67 (68.14)      | 33.66 (2.54)      | -67.86 | 19.99    | -47.88   |
|                                          | BPc-1 | -253.35  | 147.11 (-)          | 33.76 (-)         | -72.48 | 22.42    | -50.06   |
| $\langle S_1 S_0   \hat{H}   CA \rangle$ | BPc   | -373.19  | 271.67 (68.14)      | 33.66 (2.54)      | -67.86 | -8.89    | -76.76   |
|                                          | BPc-1 | -253.35  | 147.11 (-)          | 33.76 (-)         | -72.48 | -10.39   | -82.87   |
| $\langle S_1 S_0   \hat{H}   AC \rangle$ | BPc   | -1434.71 | 1375.42 (1339.64)   | 15.64 (-3.05)     | -43.65 | 4.80     | -38.85   |
|                                          | BPc-1 | -168.78  | 111.46 (-)          | 17.36 (-)         | -39.96 | 5.79     | -34.16   |
| $\langle S_0 S_1   \hat{H}   TT \rangle$ | BPc   | -        | -                   | -                 | -      | 0.69     | 0.69     |
|                                          | BPc-1 | -        | -                   | -                 | -      | 0.81     | 0.81     |
| $\langle S_1 S_0   \hat{H}   TT \rangle$ | BPc   | -        | -                   | -                 | -      | -0.27    | -0.27    |
|                                          | BPc-1 | -        | -                   | -                 | -      | -0.32    | -0.32    |
| $\langle CA   \hat{H}   TT \rangle$      | BPc   | -533.98  | 535.21 (338.45)     | -9.13 (0.40)      | -7.9   | -2.60    | -10.50   |
|                                          | BPc-1 | -109.51  | 109.38 (-)          | -6.43 (-)         | -6.56  | -2.13    | -8.69    |
| $\langle AC   \hat{H}   TT \rangle$      | BPc   | 22.13    | -31.78 (-77.36)     | 6.37 (-1.66)      | -3.28  | -2.76    | -6.04    |
|                                          | BPc-1 | -69.08   | 57.79 (-)           | 7.07 (-)          | -4.22  | -3.80    | -8.03    |

**Table S19.** Energies of five diabatic states of BPc at 1.5 ns in MD simulation. (eV)

|       | $E_{S_0 S_1}$ | $E_{S_1 S_0}$ | $E_{CA}$ | $E_{AC}$ | $E_{TT}$ |
|-------|---------------|---------------|----------|----------|----------|
| BPc   | 2.72          | 2.98          | 3.42     | 3.38     | 1.75     |
| BPc-1 | 2.80          | 3.06          | 3.64     | 3.33     | 1.83     |

**Table 20.** Decomposition of electronic coupling of BPc at 2.0 ns in MD simulation. (meV)

|                                    |       | <i>F</i> |                         |                         |        | <i>g</i> | <i>V</i> |
|------------------------------------|-------|----------|-------------------------|-------------------------|--------|----------|----------|
|                                    |       | <i>h</i> | $2J$ ( $2J^{\dagger}$ ) | $-K$ ( $-K^{\dagger}$ ) | total  |          |          |
| $\langle S_0S_1 \hat{H} CA\rangle$ | BPc   | -1142.64 | 1014.71 (1154.91)       | 34.95 (2.43)            | -92.98 | 29.12    | -63.86   |
|                                    | BPc-1 | 26.23    | -141.68 (-)             | 30.46 (-)               | -84.99 | 25.14    | -59.85   |
| $\langle S_0S_1 \hat{H} AC\rangle$ | BPc   | -860.55  | 957.35 (601.56)         | -34.86 (-3.40)          | 61.94  | -0.72    | 61.22    |
|                                    | BPc-1 | -343.94  | 444.29 (-)              | -34.84 (-)              | 65.51  | -0.63    | 64.88    |
| $\langle S_1S_0 \hat{H} CA\rangle$ | BPc   | -860.55  | 957.35 (601.56)         | -34.86 (-3.40)          | 61.94  | 25.85    | 87.78    |
|                                    | BPc-1 | -343.94  | 444.29 (-)              | -34.84 (-)              | 65.51  | 32.21    | 97.71    |
| $\langle S_1S_0 \hat{H} AC\rangle$ | BPc   | 1142.64  | -1014.71 (-1154.91)     | -34.95 (-2.43)          | 92.98  | -13.12   | 79.85    |
|                                    | BPc-1 | -26.23   | 141.68 (-)              | -30.46 (-)              | 84.99  | -14.30   | 70.69    |
| $\langle S_0S_1 \hat{H} TT\rangle$ | BPc   | -        | -                       | -                       | -      | -0.08    | -0.08    |
|                                    | BPc-1 | -        | -                       | -                       | -      | -0.08    | -0.08    |
| $\langle S_1S_0 \hat{H} TT\rangle$ | BPc   | -        | -                       | -                       | -      | -0.31    | -0.31    |
|                                    | BPc-1 | -        | -                       | -                       | -      | -0.31    | -0.31    |
| $\langle CA \hat{H} TT\rangle$     | BPc   | 241.92   | -243.50 (-308.75)       | 4.36 (8.61)             | 2.78   | 0.01     | 2.78     |
|                                    | BPc-1 | 79.65    | -64.93 (-)              | -6.23 (-)               | 8.49   | 3.55     | 12.05    |
| $\langle AC \hat{H} TT\rangle$     | BPc   | -655.07  | 615.67 (797.16)         | 16.62 (-7.39)           | -22.78 | -22.53   | -45.29   |
|                                    | BPc-1 | 80.18    | -128.58 (-)             | 24.75 (-)               | -23.65 | -29.80   | -53.45   |

**Table S21.** Energies of five diabatic states of BPc at 2.0 ns in MD simulation. (eV)

|       | $E_{S_0S_1}$ | $E_{S_1S_0}$ | $E_{CA}$ | $E_{AC}$ | $E_{TT}$ |
|-------|--------------|--------------|----------|----------|----------|
| BPc   | 2.77         | 2.71         | 3.21     | 3.10     | 1.50     |
| BPc-1 | 2.84         | 2.80         | 3.34     | 3.13     | 1.58     |

**Table S22.** Decomposition of electronic coupling of BPc at 2.5 ns in MD simulation. (meV)

|                                    |       | <i>F</i> |                         |                         |        | <i>g</i> | <i>V</i> |
|------------------------------------|-------|----------|-------------------------|-------------------------|--------|----------|----------|
|                                    |       | <i>h</i> | $2J$ ( $2J^{\dagger}$ ) | $-K$ ( $-K^{\dagger}$ ) | total  |          |          |
| $\langle S_0S_1 \hat{H} CA\rangle$ | BPc   | -349.11  | 371.55 (38.95)          | -10.18 (2.19)           | 12.26  | 3.23     | 15.49    |
|                                    | BPc-1 | -286.14  | 308.29 (-)              | -9.97 (-)               | 12.18  | 3.36     | 15.53    |
| $\langle S_0S_1 \hat{H} AC\rangle$ | BPc   | -428.74  | 383.03 (153.49)         | 18.60 (5.75)            | -27.11 | 11.08    | -16.03   |
|                                    | BPc-1 | -120.06  | 73.78 (-)               | 18.58 (-)               | -27.7  | 9.43     | -18.27   |
| $\langle S_1S_0 \hat{H} CA\rangle$ | BPc   | -428.74  | 383.03 (153.49)         | 18.60 (5.75)            | -27.11 | 6.62     | -20.50   |
|                                    | BPc-1 | -120.06  | 73.78 (-)               | 18.58 (-)               | -27.7  | 5.19     | -22.51   |
| $\langle S_1S_0 \hat{H} AC\rangle$ | BPc   | 349.11   | -371.55 (-38.95)        | 10.18 (-2.19)           | -12.26 | 0.76     | -11.50   |
|                                    | BPc-1 | 286.14   | -308.29 (-)             | 9.97 (-)                | -12.18 | -0.09    | -12.27   |
| $\langle S_0S_1 \hat{H} TT\rangle$ | BPc   | -        | -                       | -                       | -      | -0.18    | -0.18    |
|                                    | BPc-1 | -        | -                       | -                       | -      | -0.19    | -0.19    |
| $\langle S_1S_0 \hat{H} TT\rangle$ | BPc   | -        | -                       | -                       | -      | -0.49    | -0.49    |
|                                    | BPc-1 | -        | -                       | -                       | -      | -0.52    | -0.52    |
| $\langle CA \hat{H} TT\rangle$     | BPc   | 755.87   | -780.40 (-373.70)       | 18.32 (5.80)            | -6.21  | -40.83   | -47.04   |
|                                    | BPc-1 | 545.95   | -571.15 (-)             | 19.17 (-)               | -6.03  | -44.27   | -50.30   |
| $\langle AC \hat{H} TT\rangle$     | BPc   | 607.79   | -581.54 (-510.34)       | -11.58 (1.87)           | 14.67  | 12.39    | 27.05    |
|                                    | BPc-1 | 192.04   | -165.71 (-)             | -11.27 (-)              | 15.06  | 11.81    | 26.87    |

**Table S23.** Energies of five diabatic states of BPc at 2.5 ns in MD simulation. (eV)

|       | $E_{S_0S_1}$ | $E_{S_1S_0}$ | $E_{CA}$ | $E_{AC}$ | $E_{TT}$ |
|-------|--------------|--------------|----------|----------|----------|
| BPc   | 2.76         | 2.81         | 3.60     | 3.54     | 1.70     |
| BPc-1 | 2.86         | 2.89         | 3.57     | 3.77     | 1.81     |



**Table S24.** Decomposition of electronic coupling of BPc at 3.0 ns in MD simulation. (meV)

|                                          |       | <i>F</i> |                            |                            |        | <i>g</i> | <i>V</i> |
|------------------------------------------|-------|----------|----------------------------|----------------------------|--------|----------|----------|
|                                          |       | <i>h</i> | <i>2J (2J<sup>l</sup>)</i> | <i>-K (-K<sup>l</sup>)</i> | total  |          |          |
| $\langle S_0 S_1   \hat{H}   CA \rangle$ | BPc   | 1218.31  | -1301.44 (259.90)          | 13.22 (-14.66)             | -69.91 | 2.53     | -67.39   |
|                                          | BPc-1 | 1325.20  | -1405.40 (-)               | 13.26 (-)                  | -66.94 | -1.00    | -67.93   |
| $\langle S_0 S_1   \hat{H}   AC \rangle$ | BPc   | -965.47  | 1010.87 (738.37)           | -9.62 (-2.49)              | 35.78  | -3.25    | 32.52    |
|                                          | BPc-1 | -250.86  | 305.05 (-)                 | -12.91 (-)                 | 41.28  | -6.36    | 34.91    |
| $\langle S_1 S_0   \hat{H}   CA \rangle$ | BPc   | -965.47  | 1010.87 (738.37)           | -9.62 (-2.49)              | 35.78  | 23.46    | 59.24    |
|                                          | BPc-1 | -250.86  | 305.05 (-)                 | -12.91 (-)                 | 41.28  | 24.67    | 65.94    |
| $\langle S_1 S_0   \hat{H}   AC \rangle$ | BPc   | -1218.31 | 1301.44 (-259.90)          | -13.22 (14.66)             | 69.91  | 24.08    | 94.00    |
|                                          | BPc-1 | -1325.20 | 1405.40 (-)                | -13.26 (-)                 | 66.94  | 24.63    | 91.56    |
| $\langle S_0 S_1   \hat{H}   TT \rangle$ | BPc   | -        | -                          | -                          | -      | 0.64     | 0.64     |
|                                          | BPc-1 | -        | -                          | -                          | -      | 0.69     | 0.69     |
| $\langle S_1 S_0   \hat{H}   TT \rangle$ | BPc   | -        | -                          | -                          | -      | -0.78    | -0.78    |
|                                          | BPc-1 | -        | -                          | -                          | -      | -0.78    | -0.78    |
| $\langle CA   \hat{H}   TT \rangle$      | BPc   | 59.73    | -65.01 (-58.46)            | -2.60 (-2.15)              | -7.88  | -5.40    | -13.28   |
|                                          | BPc-1 | -65.41   | 52.41 (-)                  | 0.98 (-)                   | -12.02 | -9.13    | -21.14   |
| $\langle AC   \hat{H}   TT \rangle$      | BPc   | 962.90   | -968.14 (-493.16)          | 5.64 (5.64)                | 0.4    | -28.43   | -28.03   |
|                                          | BPc-1 | 588.51   | -585.45 (-)                | 0.98 (-)                   | 4.04   | -25.32   | -21.28   |

**Table S25.** Energies of five diabatic states of BPc at 3.0 ns in MD simulation. (eV)

|       | $E_{S_0 S_1}$ | $E_{S_1 S_0}$ | $E_{CA}$ | $E_{AC}$ | $E_{TT}$ |
|-------|---------------|---------------|----------|----------|----------|
| BPc   | 2.78          | 2.80          | 3.37     | 3.34     | 1.53     |
| BPc-1 | 2.86          | 2.86          | 3.53     | 3.32     | 1.61     |

**Table S26.** Decomposition of electronic coupling of BPc at 3.5 ns in MD simulation. (meV)

|                                    |       | <i>F</i> |                  |                 |        | <i>g</i> | <i>V</i> |
|------------------------------------|-------|----------|------------------|-----------------|--------|----------|----------|
|                                    |       | <i>h</i> | $2J$ ( $2J^l$ )  | $-K$ ( $-K^l$ ) | total  |          |          |
| $\langle S_0S_1 \hat{H} CA\rangle$ | BPc   | -637.68  | 711.38 (-161.38) | -23.86 (1.21)   | 49.84  | -1.95    | 47.89    |
|                                    | BPc-1 | -829.14  | 901.20 (-)       | -23.03 (-)      | 49.03  | 0.30     | 49.32    |
| $\langle S_0S_1 \hat{H} AC\rangle$ | BPc   | 625.82   | -565.79 (-77.08) | -22.64 (-10.46) | 37.39  | -13.65   | 23.73    |
|                                    | BPc-1 | 405.86   | -350.05 (-)      | -18.94 (-)      | 36.87  | -13.04   | 23.82    |
| $\langle S_1S_0 \hat{H} CA\rangle$ | BPc   | 625.82   | -565.79 (-77.08) | -22.64 (-10.46) | 37.39  | -19.54   | 17.84    |
|                                    | BPc-1 | 405.86   | -350.05 (-)      | -18.94 (-)      | 36.87  | -20.68   | 16.19    |
| $\langle S_1S_0 \hat{H} AC\rangle$ | BPc   | 637.68   | -711.38 (161.38) | 23.86 (-1.21)   | -49.84 | -15.36   | -65.20   |
|                                    | BPc-1 | 829.14   | -901.20 (-)      | 23.03 (-)       | -49.03 | -15.42   | -64.45   |
| $\langle S_0S_1 \hat{H} TT\rangle$ | BPc   | -        | -                | -               | -      | -1.33    | -1.33    |
|                                    | BPc-1 | -        | -                | -               | -      | -1.32    | -1.32    |
| $\langle S_1S_0 \hat{H} TT\rangle$ | BPc   | -        | -                | -               | -      | 0.30     | 0.30     |
|                                    | BPc-1 | -        | -                | -               | -      | 0.27     | 0.27     |
| $\langle CA \hat{H} TT\rangle$     | BPc   | 44.56    | -67.45 (-141.51) | 12.96 (3.72)    | -9.93  | -11.33   | -21.26   |
|                                    | BPc-1 | 60.37    | -83.89 (-)       | 14.09 (-)       | -9.43  | -16.28   | -25.70   |
| $\langle AC \hat{H} TT\rangle$     | BPc   | 33.32    | -82.45 (472.02)  | 34.68 (-0.60)   | -14.45 | -48.54   | -62.99   |
|                                    | BPc-1 | 437.85   | -487.32 (-)      | 34.35 (-)       | -15.12 | -47.84   | -62.96   |

**Table S27.** Energies of five diabatic states of BPc at 3.5 ns in MD simulation. (eV)

|       | $E_{S_0S_1}$ | $E_{S_1S_0}$ | $E_{CA}$ | $E_{AC}$ | $E_{TT}$ |
|-------|--------------|--------------|----------|----------|----------|
| BPc   | 2.89         | 2.99         | 3.48     | 3.47     | 2.05     |
| BPc-1 | 2.96         | 3.05         | 3.60     | 3.49     | 2.13     |

**Table S28.** Decomposition of electronic coupling of BPc at 4.0 ns in MD simulation. (meV)

|                                          |       | <i>F</i> |                     |                 |         | <i>g</i> | <i>V</i> |
|------------------------------------------|-------|----------|---------------------|-----------------|---------|----------|----------|
|                                          |       | <i>h</i> | $2J$ ( $2J^l$ )     | $-K$ ( $-K^l$ ) | total   |          |          |
| $\langle S_0 S_1   \hat{H}   CA \rangle$ | BPc   | -2622.36 | 2670.31 (893.43)    | -11.24 (0.71)   | 36.70   | 34.98    | 71.68    |
|                                          | BPc-1 | -1992.33 | 2042.37 (-)         | -13.00 (-)      | 37.05   | 41.15    | 78.20    |
| $\langle S_0 S_1   \hat{H}   AC \rangle$ | BPc   | -720.17  | 540.63 (18.21)      | 64.29 (15.83)   | -115.25 | 20.93    | -94.32   |
|                                          | BPc-1 | -544.92  | 359.21 (-)          | 63.88 (-)       | -121.83 | 22.85    | -98.98   |
| $\langle S_1 S_0   \hat{H}   CA \rangle$ | BPc   | -720.17  | 540.63 (18.21)      | 64.29 (15.83)   | -115.25 | 31.67    | -83.58   |
|                                          | BPc-1 | -544.92  | 359.21 (-)          | 63.88 (-)       | -121.83 | 33.89    | -87.94   |
| $\langle S_1 S_0   \hat{H}   AC \rangle$ | BPc   | 2622.36  | -2670.31 (-893.43)  | 11.24 (-0.71)   | -36.70  | -25.49   | -62.19   |
|                                          | BPc-1 | 1992.33  | -2042.37 (-)        | 13.00 (-)       | -37.05  | -30.83   | -67.87   |
| $\langle S_0 S_1   \hat{H}   TT \rangle$ | BPc   | -        | -                   | -               | -       | -0.34    | -0.34    |
|                                          | BPc-1 | -        | -                   | -               | -       | -0.33    | -0.33    |
| $\langle S_1 S_0   \hat{H}   TT \rangle$ | BPc   | -        | -                   | -               | -       | -0.38    | -0.38    |
|                                          | BPc-1 | -        | -                   | -               | -       | -0.45    | -0.45    |
| $\langle CA   \hat{H}   TT \rangle$      | BPc   | 2018.94  | -1984.75 (-1061.38) | -17.70 (2.02)   | 16.49   | -17.59   | -1.11    |
|                                          | BPc-1 | 961.31   | -920.77 (-)         | -23.21 (-)      | 17.33   | -12.80   | 4.53     |
| $\langle AC   \hat{H}   TT \rangle$      | BPc   | 1005.52  | -970.00 (-405.05)   | -11.41 (-3.97)  | 24.11   | 6.36     | 30.46    |
|                                          | BPc-1 | 558.00   | -516.36 (-)         | -15.52 (-)      | 26.12   | 10.80    | 36.92    |

**Table S29.** Energies of five diabatic states of BPc at 4.0 ns in MD simulation. (eV)

|       | $E_{S_0 S_1}$ | $E_{S_1 S_0}$ | $E_{CA}$ | $E_{AC}$ | $E_{TT}$ |
|-------|---------------|---------------|----------|----------|----------|
| BPc   | 2.67          | 2.89          | 3.26     | 3.34     | 1.61     |
| BPc-1 | 2.74          | 2.94          | 3.28     | 3.45     | 1.68     |

**Table S30.** Decomposition of electronic coupling of BPc at 4.5 ns in MD simulation. (meV)

|                                          |       | <i>F</i> |                            |                            |              | <i>g</i> | <i>V</i> |
|------------------------------------------|-------|----------|----------------------------|----------------------------|--------------|----------|----------|
|                                          |       | <i>h</i> | <i>2J (2J<sup>l</sup>)</i> | <i>-K (-K<sup>l</sup>)</i> | <i>total</i> |          |          |
| $\langle S_0 S_1   \hat{H}   CA \rangle$ | BPc   | 846.92   | -1043.01 (17.98)           | 71.58 (-11.52)             | -124.52      | 1.57     | -122.95  |
|                                          | BPc-1 | 1196.77  | -1409.64 (-)               | 80.44 (-)                  | -132.43      | -7.82    | -140.25  |
| $\langle S_0 S_1   \hat{H}   AC \rangle$ | BPc   | 928.84   | -731.66 (-190.06)          | -80.32 (-25.95)            | 116.86       | -18.12   | 98.74    |
|                                          | BPc-1 | 462.43   | -250.80 (-)                | -80.74 (-)                 | 130.90       | -22.43   | 108.47   |
| $\langle S_1 S_0   \hat{H}   CA \rangle$ | BPc   | 928.84   | -731.66 (-190.06)          | -80.32 (-25.95)            | 116.86       | -5.58    | 111.28   |
|                                          | BPc-1 | 462.43   | -250.80 (-)                | -80.74 (-)                 | 130.90       | -10.02   | 120.87   |
| $\langle S_1 S_0   \hat{H}   AC \rangle$ | BPc   | -846.92  | 1043.01 (-17.98)           | -71.58 (11.52)             | 124.52       | 4.57     | 129.09   |
|                                          | BPc-1 | -1196.77 | 1409.64 (-)                | -80.44 (-)                 | 132.43       | 13.07    | 145.50   |
| $\langle S_0 S_1   \hat{H}   TT \rangle$ | BPc   | -        | -                          | -                          | -            | 0.59     | 0.59     |
|                                          | BPc-1 | -        | -                          | -                          | -            | 0.58     | 0.58     |
| $\langle S_1 S_0   \hat{H}   TT \rangle$ | BPc   | -        | -                          | -                          | -            | 0.03     | 0.03     |
|                                          | BPc-1 | -        | -                          | -                          | -            | 0.05     | 0.05     |
| $\langle CA   \hat{H}   TT \rangle$      | BPc   | -340.00  | 335.05 (232.34)            | -2.34 (-1.43)              | -7.29        | 0.89     | -6.40    |
|                                          | BPc-1 | -132.45  | 130.67 (-)                 | -5.07 (-)                  | -6.85        | 0.62     | -6.23    |
| $\langle AC   \hat{H}   TT \rangle$      | BPc   | -391.41  | 378.10 (178.18)            | 4.19 (-2.25)               | -9.12        | 1.08     | -8.04    |
|                                          | BPc-1 | -344.56  | 329.00 (-)                 | 4.16 (-)                   | -11.4        | 0.79     | -10.61   |

**Table S31.** Energies of five diabatic states of BPc at 4.5 ns in MD simulation. (eV)

|       | $E_{S_0 S_1}$ | $E_{S_1 S_0}$ | $E_{CA}$ | $E_{AC}$ | $E_{TT}$ |
|-------|---------------|---------------|----------|----------|----------|
| BPc   | 2.88          | 3.00          | 3.18     | 3.18     | 2.08     |
| BPc-1 | 2.94          | 3.07          | 3.22     | 3.27     | 2.14     |

**Table S32.** Decomposition of electronic coupling of BPc at 5.0 ns in MD simulation. (meV)

|                                          |       | $F$      |                   |                 |        | $g$    | $V$    |
|------------------------------------------|-------|----------|-------------------|-----------------|--------|--------|--------|
|                                          |       | $h$      | $2J (2J^1)$       | $-K (-K^1)$     | total  |        |        |
| $\langle S_0 S_1   \hat{H}   CA \rangle$ | BPc   | 849.94   | -958.31 (29.47)   | 42.13 (-9.61)   | -66.27 | -6.63  | -72.86 |
|                                          | BPc-1 | 1487.79  | -1620.94 (-)      | 60.72 (-)       | -72.43 | -20.56 | -92.99 |
| $\langle S_0 S_1   \hat{H}   AC \rangle$ | BPc   | -844.93  | 1074.09 (756.43)  | -98.34 (-27.66) | 130.82 | 6.14   | 136.96 |
|                                          | BPc-1 | -800.16  | 1052.32 (-)       | -108.06 (-)     | 144.1  | 7.71   | 151.81 |
| $\langle S_1 S_0   \hat{H}   CA \rangle$ | BPc   | -844.93  | 1074.09 (756.43)  | -98.34 (-27.66) | 130.82 | 8.45   | 139.27 |
|                                          | BPc-1 | -800.16  | 1052.32 (-)       | -108.06 (-)     | 144.1  | 11.48  | 155.58 |
| $\langle S_1 S_0   \hat{H}   AC \rangle$ | BPc   | -849.94  | 958.31 (-29.47)   | -42.13 (9.61)   | 66.24  | 9.52   | 75.75  |
|                                          | BPc-1 | -1487.79 | 1620.94 (-)       | -60.72 (-)      | 72.43  | 22.91  | 95.34  |
| $\langle S_0 S_1   \hat{H}   TT \rangle$ | BPc   | -        | -                 | -               | -      | -0.1   | -0.1   |
|                                          | BPc-1 | -        | -                 | -               | -      | -0.07  | -0.07  |
| $\langle S_1 S_0   \hat{H}   TT \rangle$ | BPc   | -        | -                 | -               | -      | -0.04  | -0.04  |
|                                          | BPc-1 | -        | -                 | -               | -      | -0.15  | -0.15  |
| $\langle CA   \hat{H}   TT \rangle$      | BPc   | -410.18  | 415.55 (76.94)    | -5.97 (2.47)    | -0.6   | 25.51  | 24.91  |
|                                          | BPc-1 | -325.30  | 329.61 (-)        | -4.07 (-)       | 0.24   | 27.76  | 28.00  |
| $\langle AC   \hat{H}   TT \rangle$      | BPc   | 620.76   | -611.50 (-281.04) | -4.04 (3.59)    | 5.22   | -3.72  | 1.51   |
|                                          | BPc-1 | 381.06   | -359.59 (-)       | -11.70 (-)      | 9.77   | 3.17   | 12.93  |

**Table S33.** Energies of five diabatic states of BPc at 5.0 ns in MD simulation. (eV)

|       | $E_{S_0 S_1}$ | $E_{S_1 S_0}$ | $E_{CA}$ | $E_{AC}$ | $E_{TT}$ |
|-------|---------------|---------------|----------|----------|----------|
| BPc   | 2.73          | 2.70          | 2.97     | 2.82     | 1.32     |
| BPc-1 | 2.67          | 2.66          | 2.95     | 2.91     | 1.36     |

**Table S34.** Effective electronic couplings ( $|V_{\text{eff}}|^2$ ), time constants ( $\tau$ ) of singlet fission in bipentacene systems.  $|V_{\text{eff}}|_{10}^2$  is the average effective electronic coupling at 10 molecular dynamics snapshots. The initial states for  $|V_{\text{eff}}|_S^2$  (eV<sup>2</sup>) and  $\tau_S$  (fs) calculation are the linear combination of two local excited states with the largest transition dipole.

|     | $ V_{\text{eff}} _{10}^2$ (meV <sup>2</sup> ) | $ V_{\text{eff}} _S^2$ (meV <sup>2</sup> ) | $\tau$ (ps) | $\tau_S$ (ps) | $\tau_{\text{exp}}$ (ps) |
|-----|-----------------------------------------------|--------------------------------------------|-------------|---------------|--------------------------|
| BPc | 10.41                                         | 9.26                                       | 10.3        | 11.5          | 13.8                     |
| BP1 | 0.21                                          | 0.21                                       | 228.8       | 228.8         | 20.0                     |

## 4. Molecular design

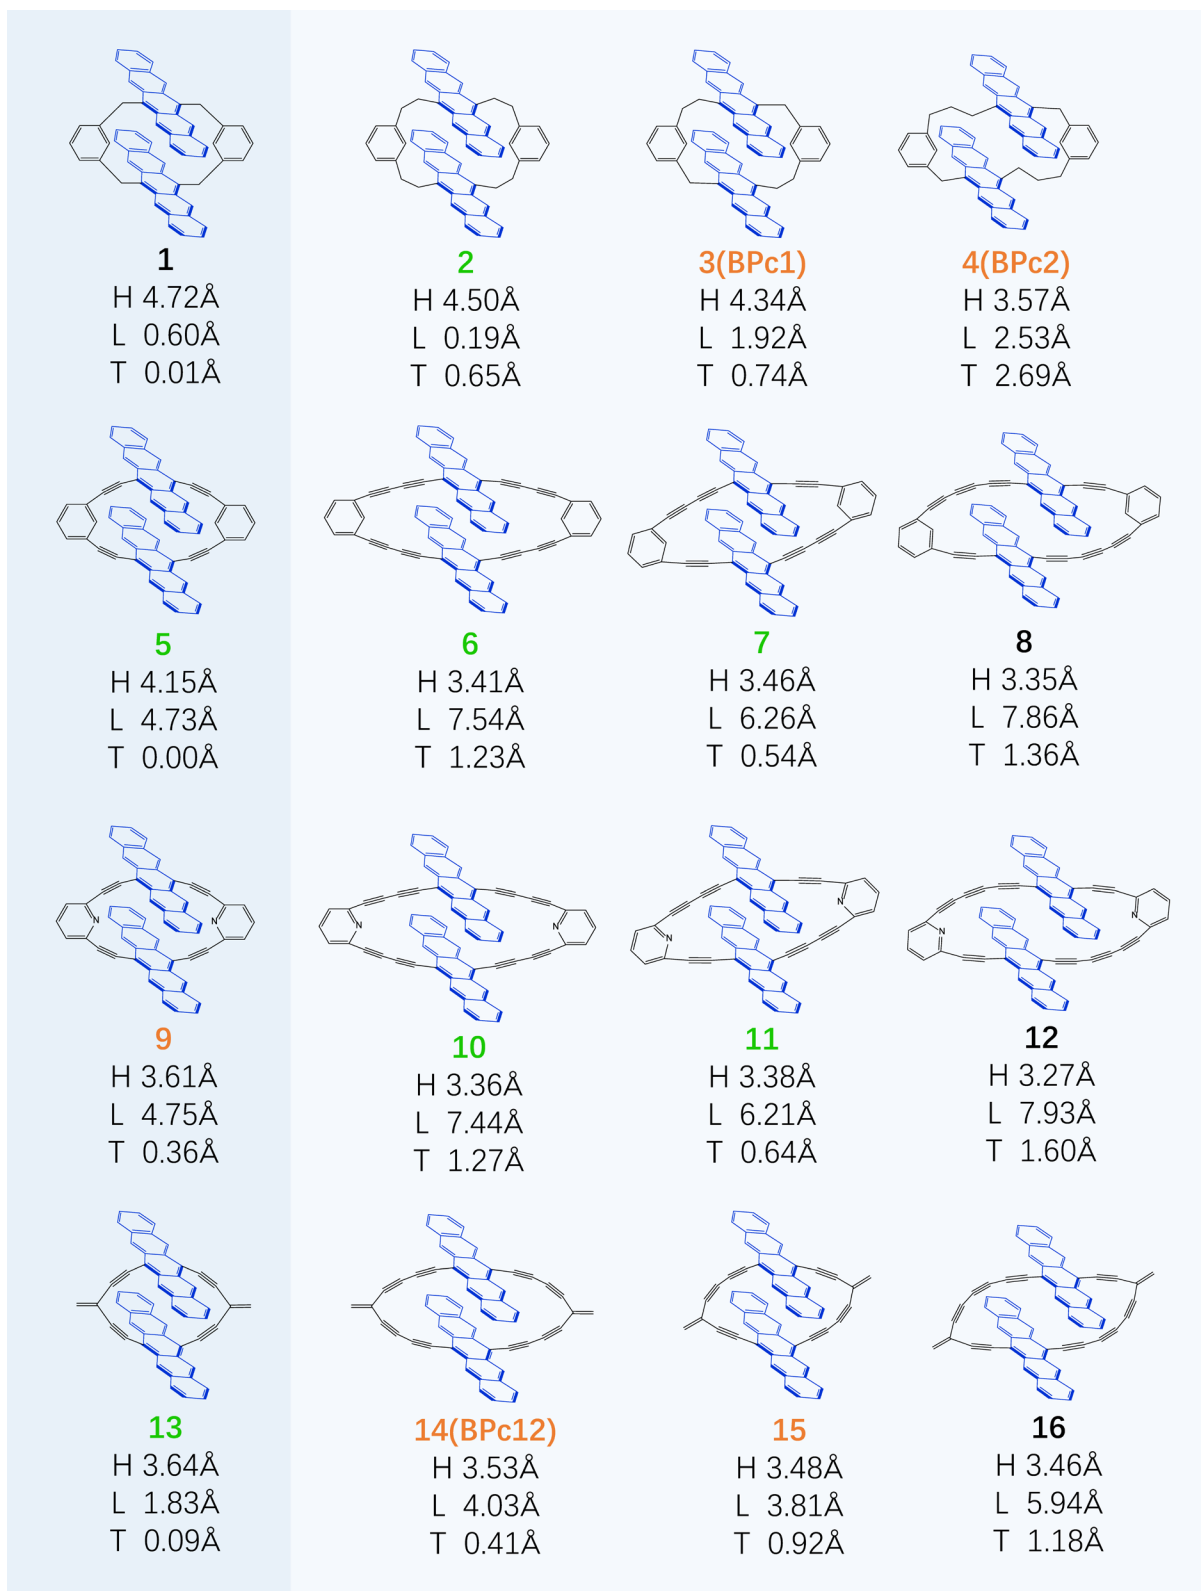

Figure S8

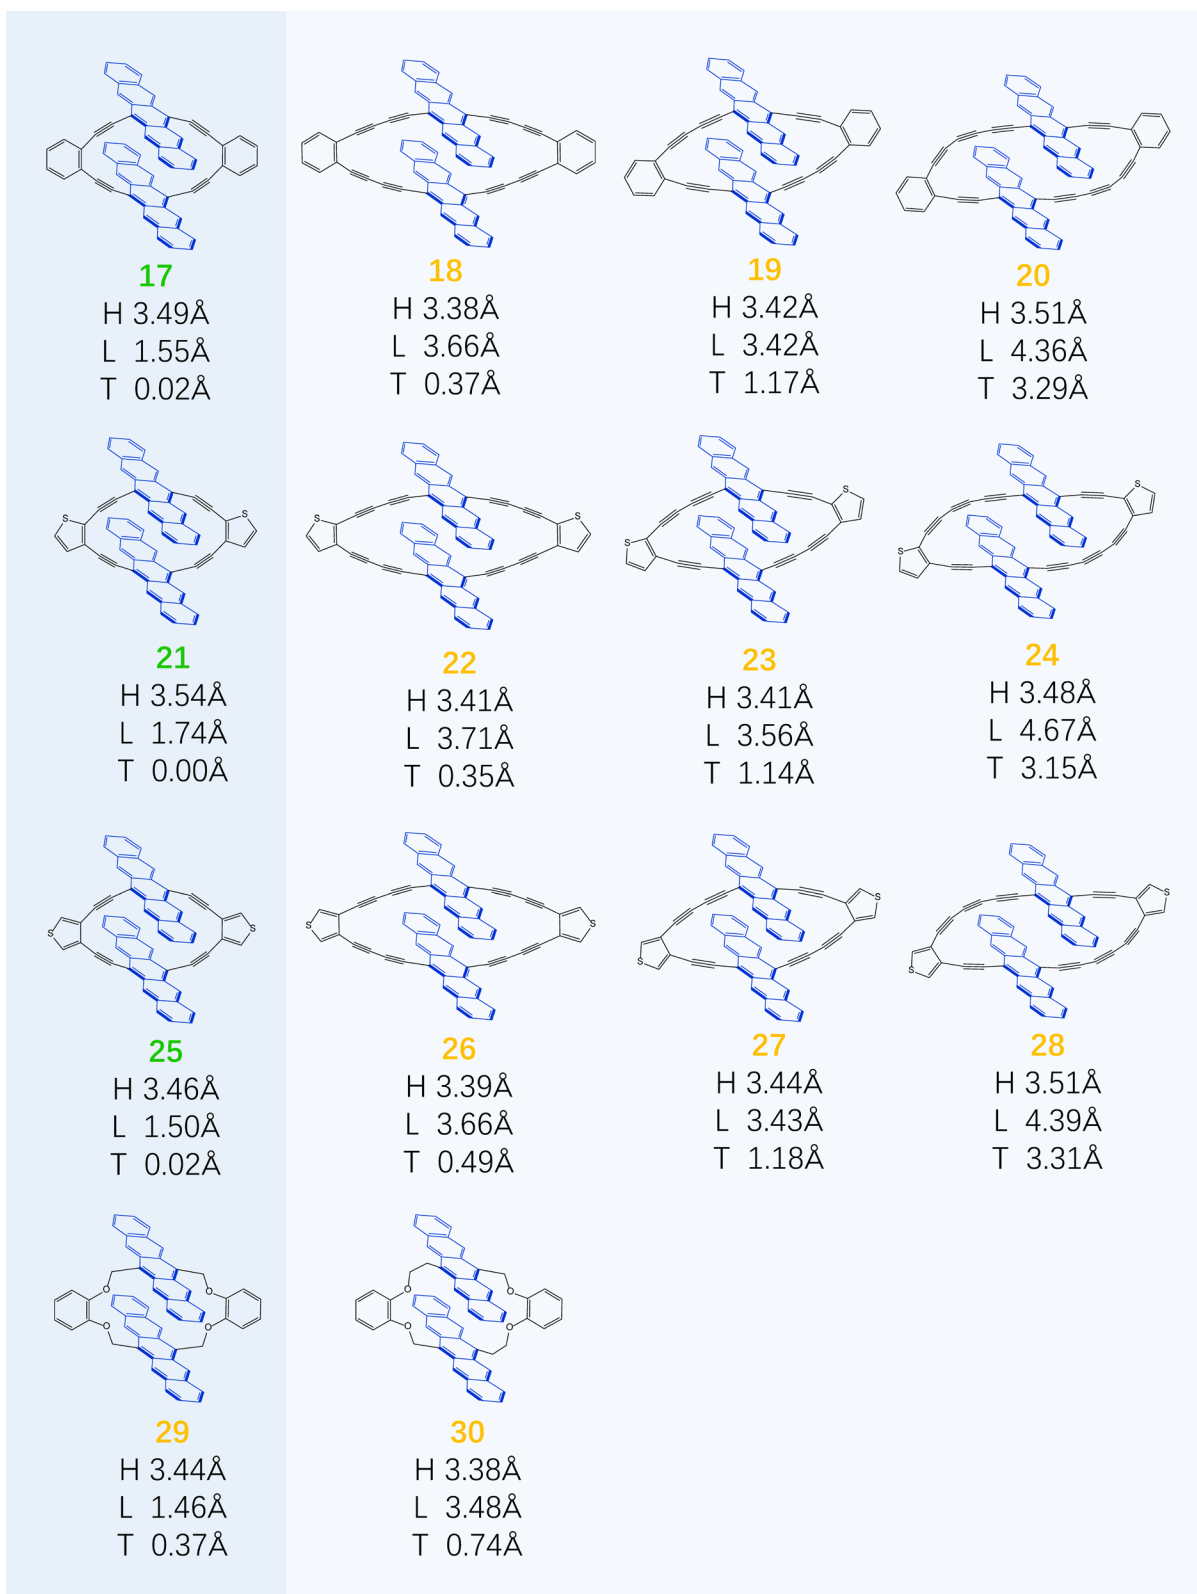

**Figure S8 (continued)**

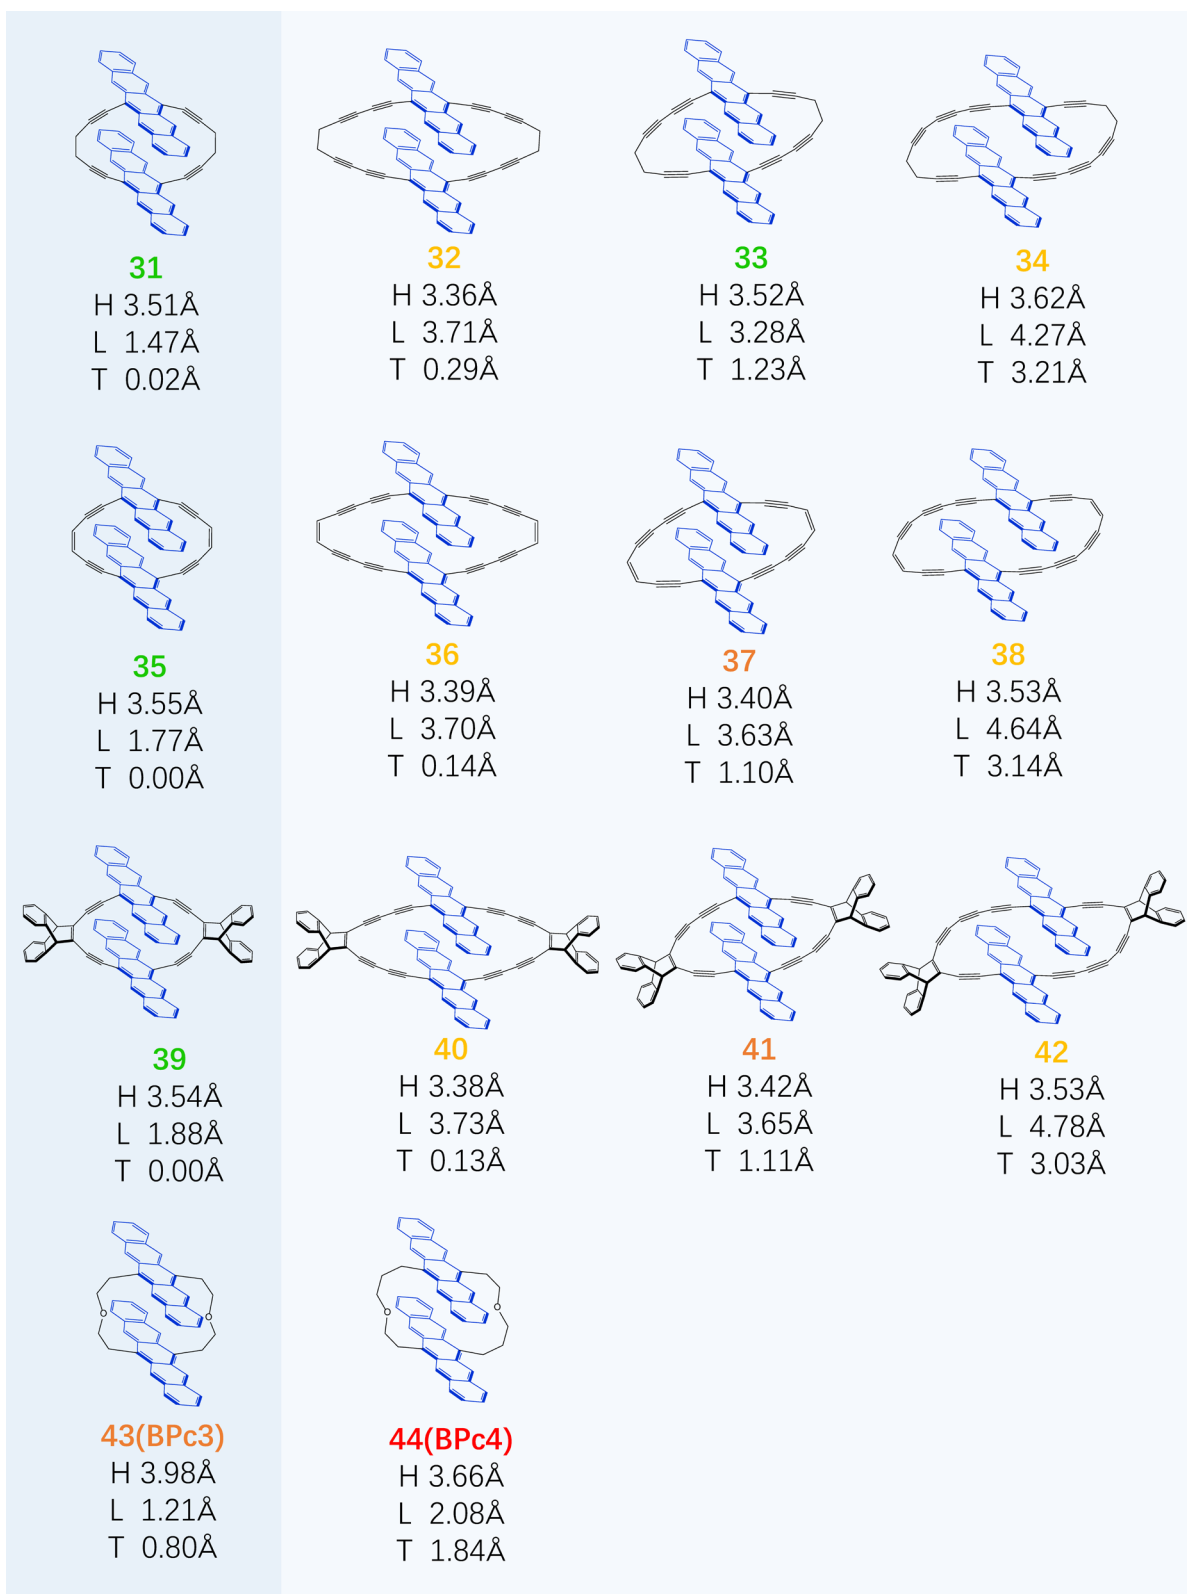

**Figure S8** (continued)



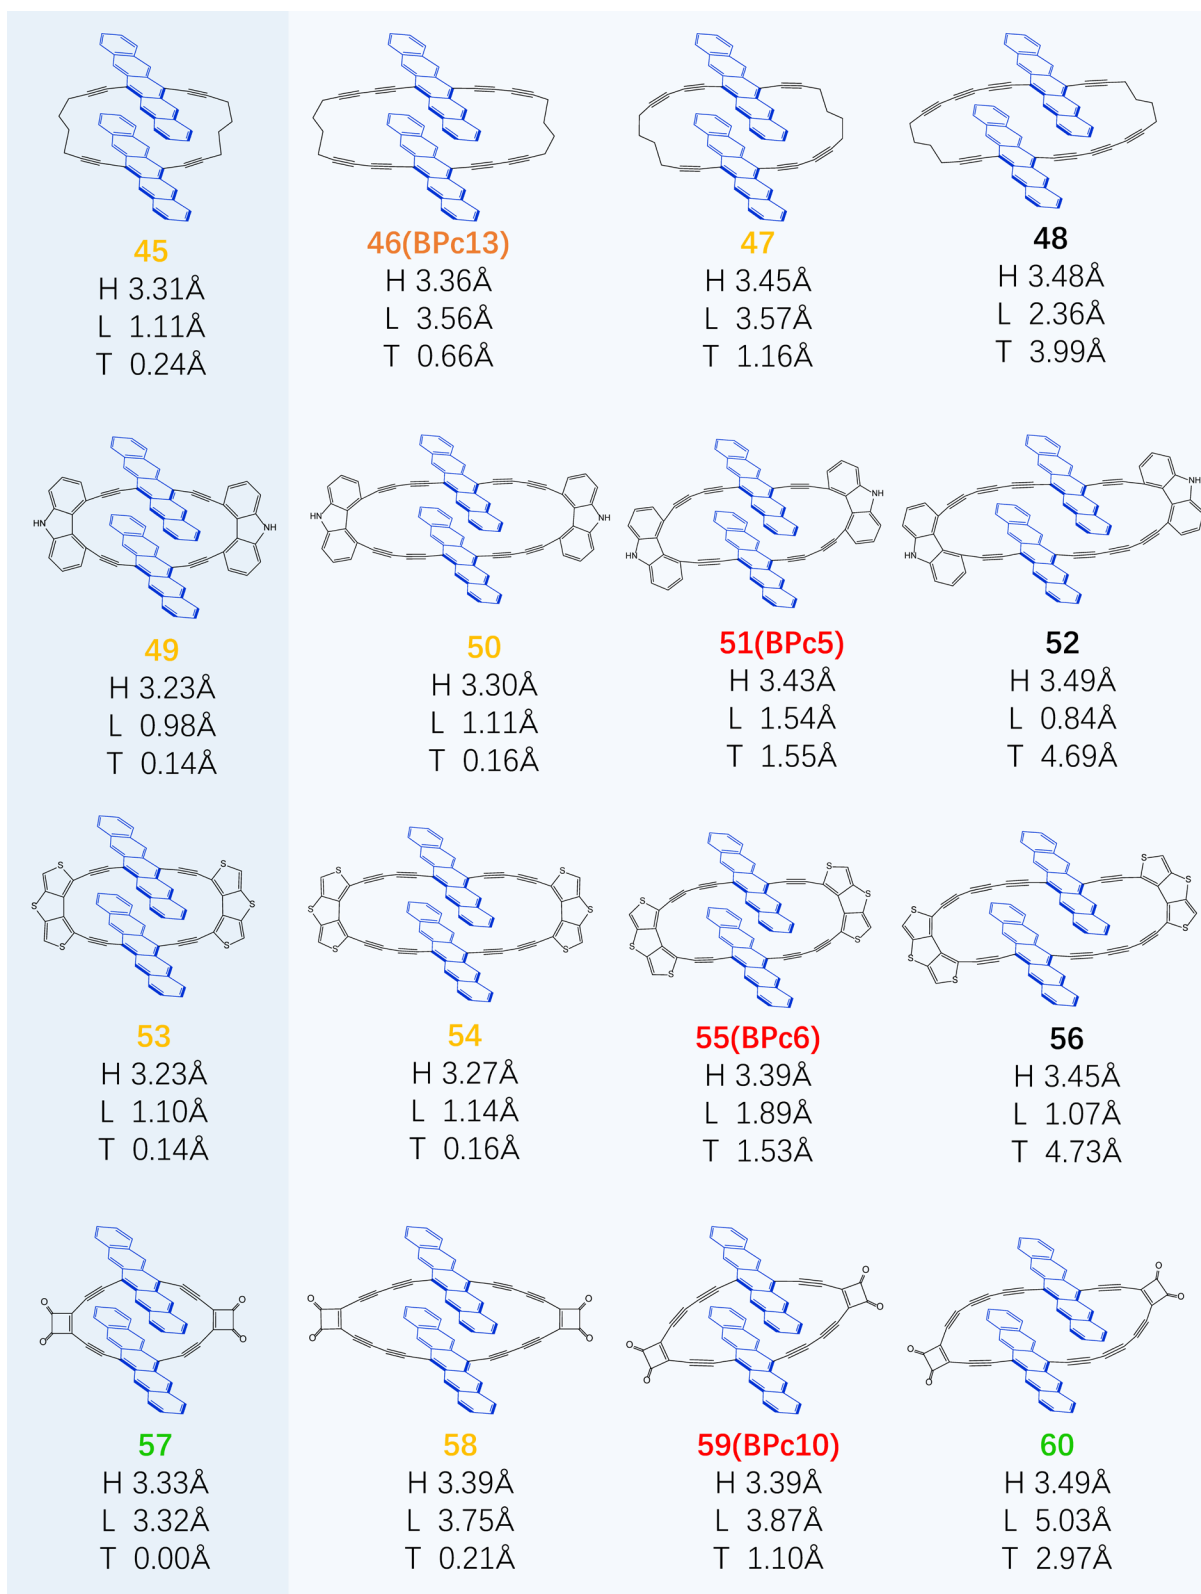

**Figure S8 (continued)**

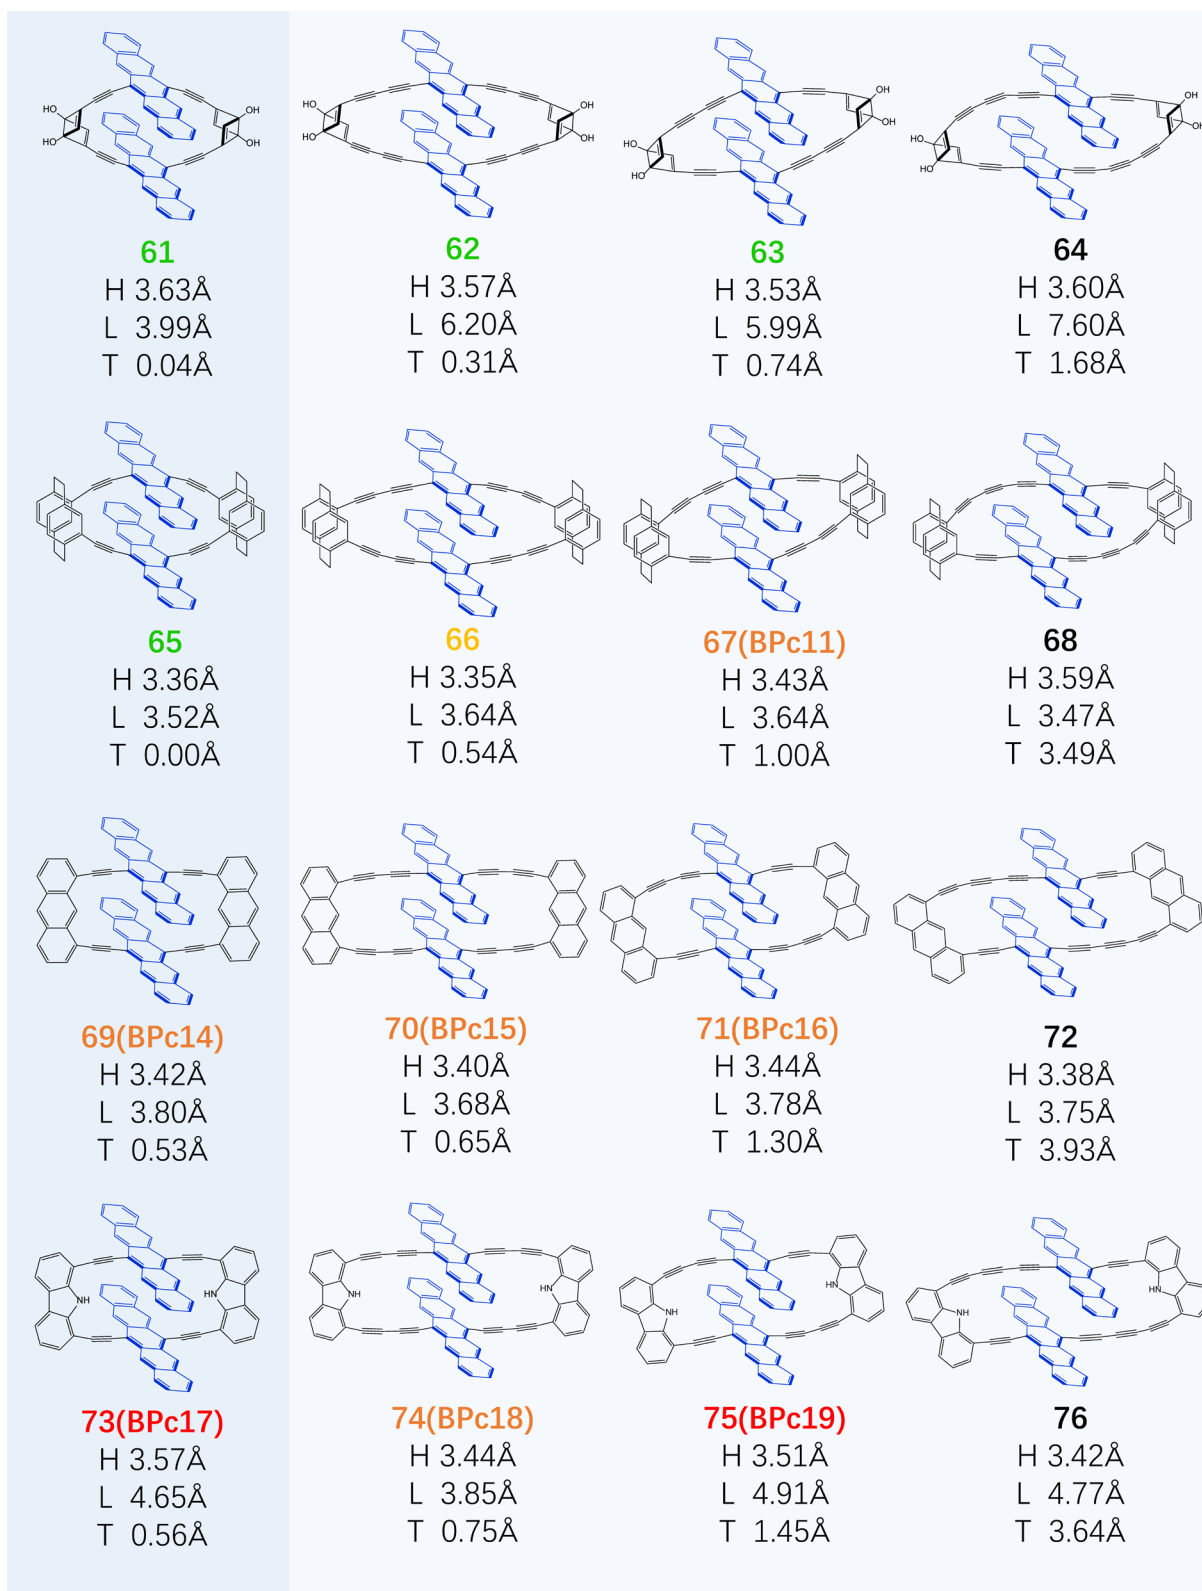

**Figure S8** (continued)

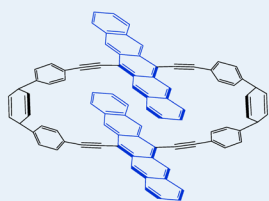

**77**

H 3.45Å  
L 3.55Å  
T 0.37Å

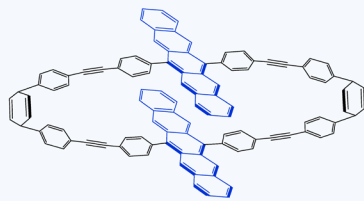

**78**

H 3.55Å  
L 6.10Å  
T 0.00Å

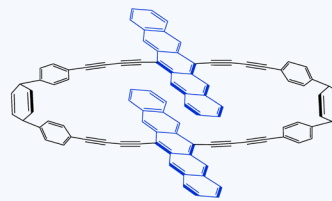

**79**

H 3.39Å  
L 3.46Å  
T 0.49Å

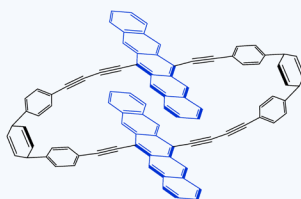

**80(BPc7)**

H 3.42Å  
L 1.63Å  
T 1.37Å

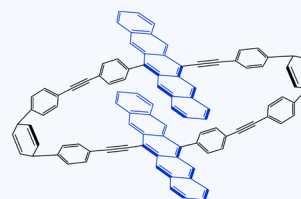

**81**

H 4.27Å  
L 3.54Å  
T 2.92Å

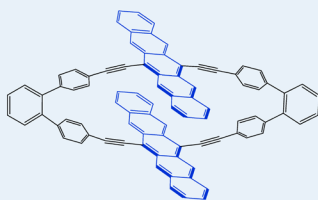

**82(BPc9)**

H 3.39Å  
L 3.76Å  
T 0.71Å

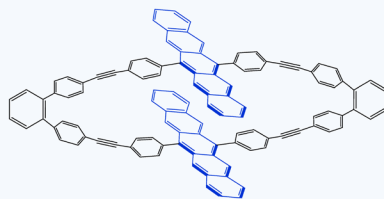

**83**

H 3.53Å  
L 6.13Å  
T 0.00Å

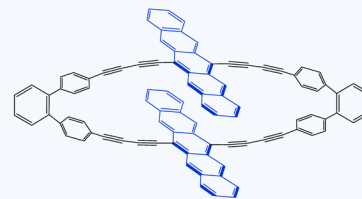

**84**

H 3.43Å  
L 3.76Å  
T 0.76Å

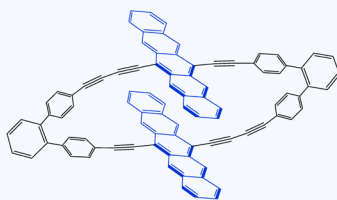

**85**

H 3.51Å  
L 3.88Å  
T 1.21Å

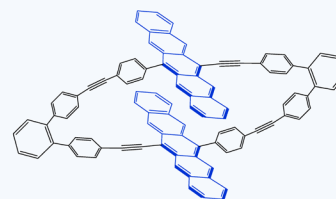

**86**

H 4.82Å  
L 4.09Å  
T 4.56Å

**Figure S8 (continued)**

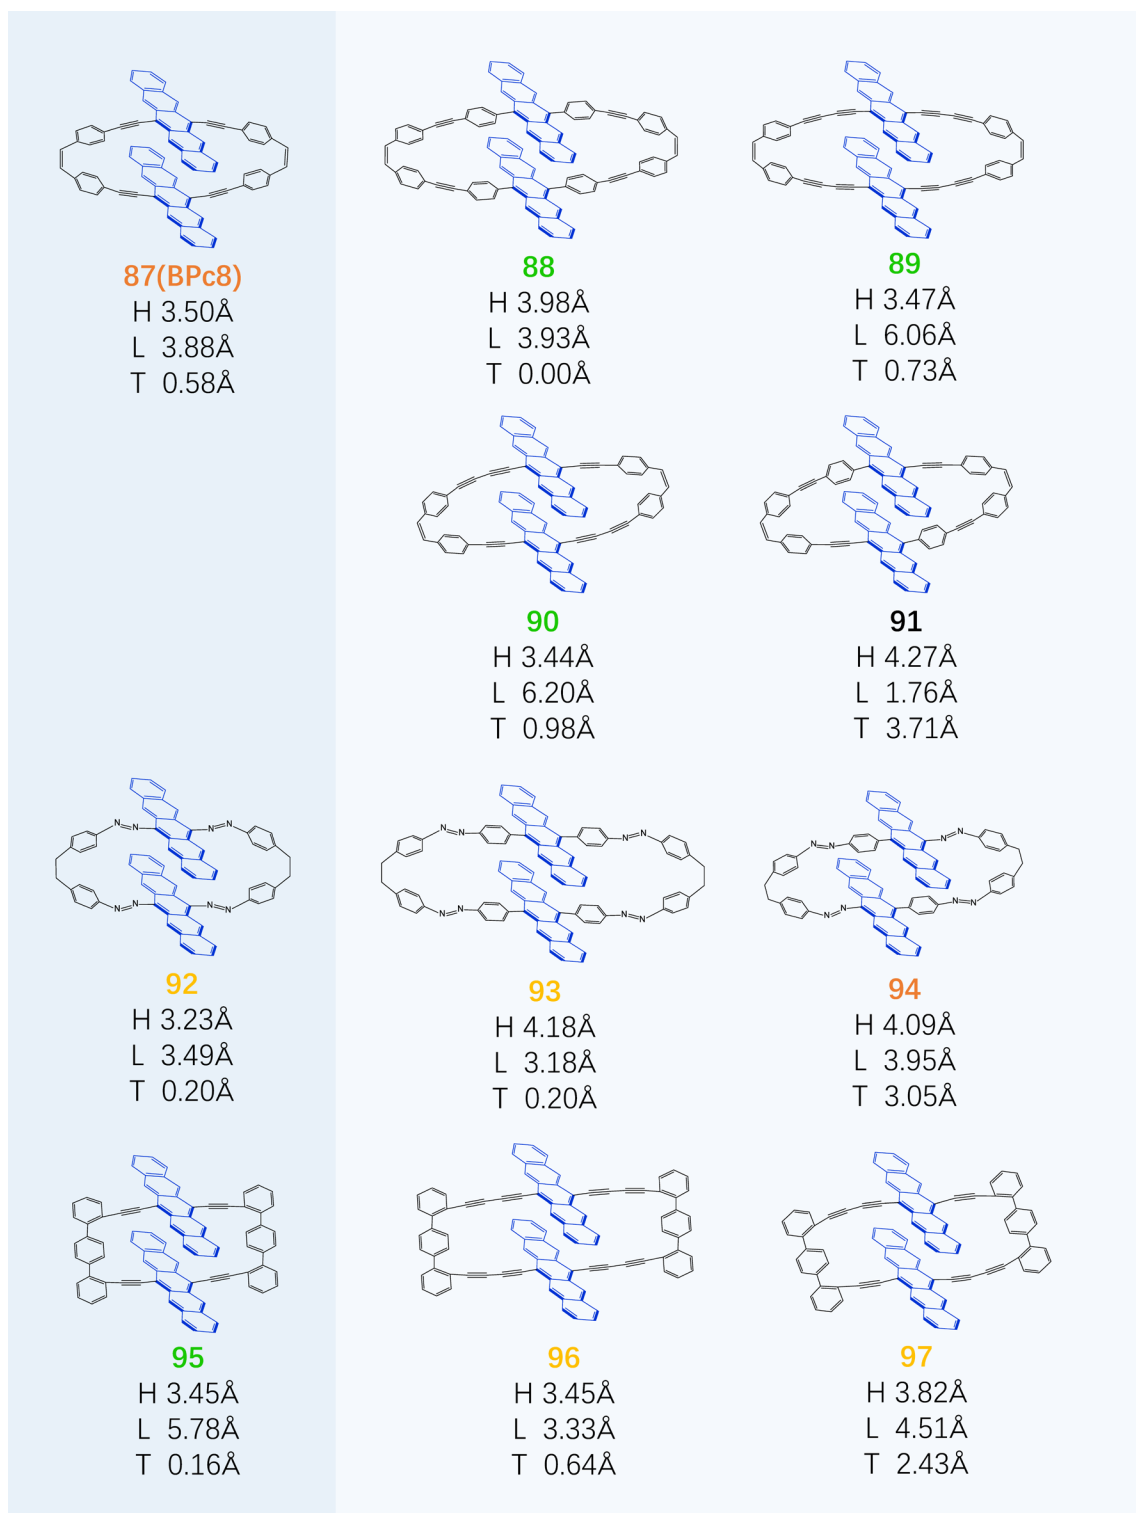

**Figure S8.** The designed bipentacene macrocycles for iSF. In parentheses are the labels of the corresponding molecules in the main text. According to the regions of Fig. 5b in the main text where the slipped distance (T/L) is located, use the same colour label.



| $\tau_S$                                      | 401.2                                          |         |         |         |         |         |         |         |         |         |
|-----------------------------------------------|------------------------------------------------|---------|---------|---------|---------|---------|---------|---------|---------|---------|
| <b>BPc2</b>                                   |                                                |         |         |         |         |         |         |         |         |         |
| $\langle S_0 S_1   \hat{H}   CA \rangle$      | 31.31                                          | 4.64    | 20.78   | -13.23  | 41.19   | 0.48    | 26.01   | 34.26   | 23.18   | 21.37   |
| $\langle S_0 S_1   \hat{H}   AC \rangle$      | 158.65                                         | 120.31  | 84.97   | 85.34   | -58.56  | 151.21  | 163.26  | 96.85   | 145.44  | -15.89  |
| $\langle S_1 S_0   \hat{H}   CA \rangle$      | -147.34                                        | -99.73  | -67.51  | -68.19  | 83.08   | -150.91 | -156.50 | -115.34 | -157.07 | 56.46   |
| $\langle S_1 S_0   \hat{H}   AC \rangle$      | -27.76                                         | -10.77  | -17.77  | 10.90   | -42.22  | -2.21   | -29.25  | -34.47  | -21.10  | -23.22  |
| $\langle S_0 S_1   \hat{H}   TT \rangle$      | -0.30                                          | 1.30    | -2.68   | -0.72   | -1.74   | -0.73   | -1.29   | 0.79    | -1.78   | -47.14  |
| $\langle S_1 S_0   \hat{H}   TT \rangle$      | 4.22                                           | -0.77   | 2.04    | 0.82    | -0.91   | -0.26   | 2.47    | -0.39   | 0.62    | -66.26  |
| $\langle CA   \hat{H}   TT \rangle$           | 321.93                                         | 154.97  | -114.89 | -131.87 | -4.33   | -112.31 | 247.23  | -125.27 | 103.26  | 3.11    |
| $\langle AC   \hat{H}   TT \rangle$           | 211.01                                         | 75.30   | 92.51   | -11.49  | -193.18 | -83.76  | 198.08  | -147.64 | 175.07  | 35.05   |
| $\langle S_0 S_1   \hat{H}   S_0 S_1 \rangle$ | 2.80                                           | 2.91    | 2.84    | 2.95    | 2.92    | 2.97    | 2.76    | 2.77    | 3.04    | 3.09    |
| $\langle S_1 S_0   \hat{H}   S_1 S_0 \rangle$ | 2.80                                           | 2.79    | 2.96    | 2.95    | 2.96    | 3.07    | 2.81    | 3.15    | 3.03    | 3.35    |
| $\langle CA   \hat{H}   CA \rangle$           | 3.15                                           | 3.32    | 3.35    | 3.35    | 3.41    | 3.54    | 3.11    | 3.42    | 3.47    | 2.73    |
| $\langle AC   \hat{H}   AC \rangle$           | 3.12                                           | 3.16    | 3.35    | 3.40    | 3.26    | 3.51    | 3.12    | 3.43    | 3.56    | 3.02    |
| $\langle TT   \hat{H}   TT \rangle$           | 1.55                                           | 1.57    | 1.80    | 1.89    | 1.86    | 2.20    | 1.45    | 1.92    | 2.12    | 4.72    |
| $ V_{\text{eff}}^2_{10}$<br>(variance)        | 9.89 $\times 10^{-4}$ (1.60 $\times 10^{-6}$ ) |         |         |         |         |         |         |         |         |         |
| $\tau$                                        | 108.1                                          |         |         |         |         |         |         |         |         |         |
| $ V_{\text{eff}}^2_5$<br>(variance)           | 1.25 $\times 10^{-3}$ (3.01 $\times 10^{-6}$ ) |         |         |         |         |         |         |         |         |         |
| $\tau_S$                                      | 85.7                                           |         |         |         |         |         |         |         |         |         |
| <b>BPc3</b>                                   |                                                |         |         |         |         |         |         |         |         |         |
| $\langle S_0 S_1   \hat{H}   CA \rangle$      | 273.96                                         | 238.44  | 244.26  | 207.77  | 231.10  | 222.63  | 194.12  | 237.42  | 251.79  | 153.89  |
| $\langle S_0 S_1   \hat{H}   AC \rangle$      | 306.66                                         | 203.11  | 200.11  | 274.16  | 251.34  | 288.58  | 238.55  | 280.20  | 202.87  | 92.51   |
| $\langle S_1 S_0   \hat{H}   CA \rangle$      | -305.25                                        | -202.18 | -196.25 | -262.03 | -258.13 | -272.92 | -249.80 | -257.51 | -203.92 | -98.18  |
| $\langle S_1 S_0   \hat{H}   AC \rangle$      | -283.10                                        | -244.50 | -245.61 | -216.73 | -222.23 | -236.47 | -193.82 | -265.90 | -248.56 | -141.65 |
| $\langle S_0 S_1   \hat{H}   TT \rangle$      | -0.46                                          | -0.61   | -3.39   | -0.24   | 1.30    | 0.98    | 1.80    | -5.62   | -1.25   | 2.64    |
| $\langle S_1 S_0   \hat{H}   TT \rangle$      | 0.19                                           | 0.72    | 1.77    | -1.67   | -0.70   | -0.85   | 0.16    | 3.39    | 3.33    | -2.74   |
| $\langle CA   \hat{H}   TT \rangle$           | 33.41                                          | -1.38   | 32.71   | -83.10  | -28.08  | 68.70   | -75.97  | 65.95   | 94.08   | -96.22  |
| $\langle AC   \hat{H}   TT \rangle$           | -55.05                                         | -35.42  | 34.92   | 86.73   | 43.43   | 13.34   | -39.05  | 60.84   | -92.17  | 7.81    |
| $\langle S_0 S_1   \hat{H}   S_0 S_1 \rangle$ | 2.93                                           | 2.78    | 2.80    | 3.13    | 2.89    | 2.94    | 2.83    | 2.71    | 2.88    | 3.02    |
| $\langle S_1 S_0   \hat{H}   S_1 S_0 \rangle$ | 2.99                                           | 3.01    | 2.75    | 2.86    | 2.84    | 2.82    | 2.85    | 3.13    | 2.97    | 2.97    |
| $\langle CA   \hat{H}   CA \rangle$           | 2.89                                           | 2.84    | 2.74    | 2.92    | 2.78    | 2.78    | 2.78    | 2.92    | 2.81    | 2.72    |
| $\langle AC   \hat{H}   AC \rangle$           | 3.10                                           | 2.88    | 2.68    | 2.92    | 2.80    | 2.73    | 2.73    | 2.79    | 2.88    | 2.92    |
| $\langle TT   \hat{H}   TT \rangle$           | 1.82                                           | 1.66    | 1.39    | 1.93    | 1.52    | 1.45    | 1.58    | 1.79    | 1.91    | 1.85    |
| $ V_{\text{eff}}^2_{10}$<br>(variance)        | 1.14 $\times 10^{-3}$ (3.14 $\times 10^{-6}$ ) |         |         |         |         |         |         |         |         |         |
| $\tau$                                        | 94.1                                           |         |         |         |         |         |         |         |         |         |
| $ V_{\text{eff}}^2_5$<br>(variance)           | 1.19 $\times 10^{-3}$ (2.50 $\times 10^{-6}$ ) |         |         |         |         |         |         |         |         |         |
| $\tau_S$                                      | 89.7                                           |         |         |         |         |         |         |         |         |         |
| <b>BPc4</b>                                   |                                                |         |         |         |         |         |         |         |         |         |
| $\langle S_0 S_1   \hat{H}   CA \rangle$      | 50.06                                          | 0.22    | 5.84    | -24.34  | 96.78   | -7.82   | 62.11   | 33.07   | -31.49  | 73.12   |
| $\langle S_0 S_1   \hat{H}   AC \rangle$      | -19.08                                         | -37.33  | -19.49  | -167.76 | 38.11   | 40.99   | 131.55  | 79.42   | 71.98   | 57.28   |
| $\langle S_1 S_0   \hat{H}   CA \rangle$      | -3.53                                          | 31.62   | 24.80   | 157.31  | -46.75  | -28.52  | -133.51 | -78.86  | -64.20  | -54.68  |
| $\langle S_1 S_0   \hat{H}   AC \rangle$      | -38.37                                         | 6.36    | -26.34  | 30.79   | -99.04  | 3.20    | -77.42  | -32.59  | 27.58   | -75.50  |
| $\langle S_0 S_1   \hat{H}   TT \rangle$      | -5.10                                          | -3.70   | -0.57   | 2.01    | 2.96    | -0.58   | -1.18   | 0.27    | 1.12    | 2.07    |
| $\langle S_1 S_0   \hat{H}   TT \rangle$      | 0.25                                           | 0.08    | 1.21    | -0.45   | -0.34   | 0.24    | 1.24    | -1.05   | 1.29    | -3.27   |
| $\langle CA   \hat{H}   TT \rangle$           | -103.67                                        | -5.32   | 111.86  | 57.93   | -6.45   | -68.10  | 2.85    | -180.13 | 133.53  | -77.26  |
| $\langle AC   \hat{H}   TT \rangle$           | 186.63                                         | 89.98   | -170.28 | -97.40  | -138.91 | -176.58 | 78.02   | -211.27 | 126.44  | -41.28  |
| $\langle S_0 S_1   \hat{H}   S_0 S_1 \rangle$ | 2.75                                           | 2.92    | 2.89    | 2.90    | 2.78    | 2.95    | 2.83    | 2.72    | 2.97    | 2.71    |
| $\langle S_1 S_0   \hat{H}   S_1 S_0 \rangle$ | 3.04                                           | 2.97    | 2.89    | 3.03    | 3.00    | 3.01    | 2.92    | 2.71    | 3.05    | 2.99    |
| $\langle CA   \hat{H}   CA \rangle$           | 2.90                                           | 2.96    | 3.01    | 3.12    | 2.96    | 3.33    | 2.98    | 2.75    | 3.17    | 2.97    |

|                                         |                                                |         |         |         |         |         |         |         |         |         |
|-----------------------------------------|------------------------------------------------|---------|---------|---------|---------|---------|---------|---------|---------|---------|
| $\langle AC \hat{H} AC\rangle$          | 2.80                                           | 3.12    | 2.98    | 3.14    | 2.91    | 3.23    | 2.92    | 2.61    | 3.18    | 2.94    |
| $\langle TT \hat{H} TT\rangle$          | 1.73                                           | 1.89    | 1.70    | 1.94    | 1.63    | 2.04    | 1.76    | 1.15    | 2.18    | 1.59    |
| $ V_{\text{eff}} _{10}^2$<br>(variance) | 2.17 $\times 10^{-4}$ (6.76 $\times 10^{-8}$ ) |         |         |         |         |         |         |         |         |         |
| $\tau$                                  | 493.7                                          |         |         |         |         |         |         |         |         |         |
| $ V_{\text{eff}} _S^2$<br>(variance)    | 2.60 $\times 10^{-4}$ (1.65 $\times 10^{-7}$ ) |         |         |         |         |         |         |         |         |         |
| $\tau_S$                                | 410.9                                          |         |         |         |         |         |         |         |         |         |
| <b>BPc5</b>                             |                                                |         |         |         |         |         |         |         |         |         |
| $\langle S_0S_1 \hat{H} CA\rangle$      | -130.74                                        | -91.43  | -58.16  | 20.19   | 5.06    | -27.25  | -34.26  | -23.70  | -99.64  | -20.29  |
| $\langle S_0S_1 \hat{H} AC\rangle$      | 287.22                                         | 262.74  | 142.26  | 47.47   | 310.18  | 49.40   | 257.96  | 246.04  | 285.83  | 303.12  |
| $\langle S_1S_0 \hat{H} CA\rangle$      | -296.38                                        | -266.99 | -125.27 | -58.13  | -295.10 | -25.48  | -253.63 | -246.11 | -287.16 | -305.06 |
| $\langle S_1S_0 \hat{H} AC\rangle$      | 136.03                                         | 77.33   | 78.62   | 11.42   | -5.90   | -9.04   | 21.51   | 30.80   | 99.82   | 12.73   |
| $\langle S_0S_1 \hat{H} TT\rangle$      | 2.90                                           | 0.95    | -1.38   | 6.50    | -2.00   | -6.58   | -3.85   | 2.63    | 2.19    | -4.29   |
| $\langle S_1S_0 \hat{H} TT\rangle$      | -2.37                                          | 2.57    | 1.00    | -4.65   | 3.07    | 10.24   | 2.87    | -3.60   | -4.51   | 5.04    |
| $\langle CA \hat{H} TT\rangle$          | 188.63                                         | -243.23 | -60.17  | -18.77  | 11.63   | -34.58  | -197.56 | 168.38  | 181.63  | -141.44 |
| $\langle AC \hat{H} TT\rangle$          | 202.63                                         | -268.70 | -90.85  | 31.67   | -327.26 | -113.69 | -117.97 | 228.56  | 248.66  | -196.05 |
| $\langle S_0S_1 \hat{H} S_0S_1\rangle$  | 2.87                                           | 2.88    | 2.75    | 3.20    | 3.08    | 3.09    | 2.97    | 2.94    | 2.77    | 2.89    |
| $\langle S_1S_0 \hat{H} S_1S_0\rangle$  | 3.26                                           | 3.29    | 3.16    | 3.04    | 2.96    | 3.26    | 3.11    | 3.29    | 3.11    | 3.30    |
| $\langle CA \hat{H} CA\rangle$          | 3.20                                           | 3.20    | 2.97    | 3.10    | 2.85    | 3.26    | 3.22    | 3.14    | 3.00    | 3.15    |
| $\langle AC \hat{H} AC\rangle$          | 3.19                                           | 3.20    | 3.16    | 3.20    | 3.21    | 3.21    | 3.06    | 3.31    | 2.99    | 3.04    |
| $\langle TT \hat{H} TT\rangle$          | 2.11                                           | 2.14    | 1.66    | 2.31    | 1.91    | 2.56    | 2.25    | 2.22    | 1.73    | 2.14    |
| $ V_{\text{eff}} _{10}^2$<br>(variance) | 5.08 $\times 10^{-3}$ (6.01 $\times 10^{-5}$ ) |         |         |         |         |         |         |         |         |         |
| $\tau$                                  | 21.0                                           |         |         |         |         |         |         |         |         |         |
| $ V_{\text{eff}} _S^2$<br>(variance)    | 4.23 $\times 10^{-3}$ (1.25 $\times 10^{-5}$ ) |         |         |         |         |         |         |         |         |         |
| $\tau_S$                                | 25.2                                           |         |         |         |         |         |         |         |         |         |
| <b>BPc6</b>                             |                                                |         |         |         |         |         |         |         |         |         |
| $\langle S_0S_1 \hat{H} CA\rangle$      | -26.10                                         | -20.59  | 44.70   | -17.38  | 43.76   | -124.24 | -49.92  | 50.90   | -0.97   | -99.05  |
| $\langle S_0S_1 \hat{H} AC\rangle$      | 296.50                                         | -46.29  | 260.57  | 296.25  | 181.15  | 336.39  | 232.91  | 391.29  | 300.17  | 285.66  |
| $\langle S_1S_0 \hat{H} CA\rangle$      | -293.22                                        | 27.84   | -273.91 | -309.79 | -194.51 | -327.10 | -222.88 | -393.64 | -290.16 | -300.90 |
| $\langle S_1S_0 \hat{H} AC\rangle$      | 27.50                                          | 42.39   | -45.54  | 20.39   | -39.33  | 119.12  | 62.29   | -43.65  | 9.95    | 99.20   |
| $\langle S_0S_1 \hat{H} TT\rangle$      | -4.83                                          | -2.62   | -1.33   | -1.41   | 0.97    | -6.12   | -2.97   | -7.65   | 2.20    | 2.42    |
| $\langle S_1S_0 \hat{H} TT\rangle$      | 4.42                                           | -2.78   | 3.91    | 0.15    | -2.06   | 3.36    | 4.21    | 3.48    | -6.47   | -4.20   |
| $\langle CA \hat{H} TT\rangle$          | -205.33                                        | -51.05  | -154.19 | -291.72 | 89.79   | -254.82 | -110.75 | -354.62 | 121.76  | 202.63  |
| $\langle AC \hat{H} TT\rangle$          | -199.52                                        | 17.60   | -224.71 | 5.65    | 184.15  | -276.63 | -131.56 | -259.19 | 321.45  | 195.36  |
| $\langle S_0S_1 \hat{H} S_0S_1\rangle$  | 2.72                                           | 2.68    | 2.73    | 2.71    | 2.74    | 2.74    | 2.73    | 2.89    | 2.65    | 2.82    |
| $\langle S_1S_0 \hat{H} S_1S_0\rangle$  | 2.81                                           | 2.91    | 2.93    | 2.80    | 2.90    | 2.67    | 2.71    | 2.84    | 2.72    | 2.75    |
| $\langle CA \hat{H} CA\rangle$          | 2.63                                           | 2.80    | 2.76    | 2.63    | 2.84    | 2.54    | 2.63    | 2.80    | 2.40    | 2.78    |
| $\langle AC \hat{H} AC\rangle$          | 2.70                                           | 2.68    | 2.84    | 2.59    | 2.92    | 2.50    | 2.56    | 2.62    | 2.55    | 2.61    |
| $\langle TT \hat{H} TT\rangle$          | 1.15                                           | 1.11    | 1.16    | 0.77    | 1.13    | 0.70    | 0.98    | 1.48    | 0.70    | 0.91    |
| $ V_{\text{eff}} _{10}^2$<br>(variance) | 9.24 $\times 10^{-3}$ (3.25 $\times 10^{-4}$ ) |         |         |         |         |         |         |         |         |         |
| $\tau$                                  | 11.6                                           |         |         |         |         |         |         |         |         |         |
| $ V_{\text{eff}} _S^2$<br>(variance)    | 1.38 $\times 10^{-2}$ (7.39 $\times 10^{-4}$ ) |         |         |         |         |         |         |         |         |         |
| $\tau_S$                                | 7.8                                            |         |         |         |         |         |         |         |         |         |
| <b>BPc7</b>                             |                                                |         |         |         |         |         |         |         |         |         |
| $\langle S_0S_1 \hat{H} CA\rangle$      | 71.11                                          | 66.04   | 125.67  | -94.57  | 210.87  | 72.04   | 112.27  | 125.93  | 36.17   | 109.35  |
| $\langle S_0S_1 \hat{H} AC\rangle$      | 337.29                                         | 271.15  | 79.86   | 266.95  | -257.59 | -172.83 | -180.15 | -252.93 | 403.76  | 60.17   |
| $\langle S_1S_0 \hat{H} CA\rangle$      | -353.16                                        | -257.18 | -71.71  | -262.67 | 243.19  | 185.63  | 199.43  | 254.57  | -374.66 | -56.48  |
| $\langle S_1S_0 \hat{H} AC\rangle$      | -72.68                                         | -42.77  | -127.35 | 112.32  | -215.81 | -83.33  | -132.51 | -119.65 | -44.33  | -104.19 |
| $\langle S_0S_1 \hat{H} TT\rangle$      | 0.51                                           | 1.57    | 0.72    | -7.56   | 2.38    | -4.47   | 5.40    | 7.24    | 0.91    | 0.92    |

|                                               |                                             |         |         |         |         |         |         |         |         |         |
|-----------------------------------------------|---------------------------------------------|---------|---------|---------|---------|---------|---------|---------|---------|---------|
| $\langle S_1 S_0   \hat{H}   TT \rangle$      | -5.84                                       | -5.80   | -0.77   | 3.88    | -1.26   | 1.62    | -3.51   | -4.22   | -2.91   | -1.31   |
| $\langle CA   \hat{H}   TT \rangle$           | 71.28                                       | 122.53  | -4.82   | -331.46 | -311.92 | 116.82  | -221.59 | -237.57 | 250.37  | 46.09   |
| $\langle AC   \hat{H}   TT \rangle$           | 270.90                                      | -65.95  | -27.48  | -250.16 | -268.38 | 216.07  | -77.48  | -118.01 | 212.37  | -107.31 |
| $\langle S_0 S_1   \hat{H}   S_0 S_1 \rangle$ | 2.70                                        | 2.93    | 2.95    | 2.79    | 3.00    | 2.89    | 3.00    | 3.05    | 2.98    | 2.83    |
| $\langle S_1 S_0   \hat{H}   S_1 S_0 \rangle$ | 2.95                                        | 2.90    | 3.03    | 2.80    | 3.01    | 3.03    | 3.02    | 2.85    | 3.11    | 2.88    |
| $\langle CA   \hat{H}   CA \rangle$           | 2.79                                        | 2.78    | 3.30    | 2.73    | 3.20    | 3.08    | 3.31    | 3.08    | 3.22    | 3.03    |
| $\langle AC   \hat{H}   AC \rangle$           | 2.95                                        | 2.91    | 3.10    | 2.81    | 3.25    | 2.98    | 3.10    | 2.96    | 3.19    | 3.10    |
| $\langle TT   \hat{H}   TT \rangle$           | 1.63                                        | 1.74    | 2.09    | 1.38    | 2.07    | 1.88    | 2.11    | 1.80    | 2.32    | 1.71    |
| $ V_{\text{eff}10} ^2$<br>(variance)          | $5.79 \times 10^{-3} (1.20 \times 10^{-4})$ |         |         |         |         |         |         |         |         |         |
| $\tau$                                        | 18.4                                        |         |         |         |         |         |         |         |         |         |
| $ V_{\text{eff}S} ^2$<br>(variance)           | $8.22 \times 10^{-3} (2.28 \times 10^{-4})$ |         |         |         |         |         |         |         |         |         |
| $\tau_S$                                      | 13.0                                        |         |         |         |         |         |         |         |         |         |
| <b>BPC8</b>                                   |                                             |         |         |         |         |         |         |         |         |         |
| $\langle S_0 S_1   \hat{H}   CA \rangle$      | 299.42                                      | 290.39  | 339.61  | 381.02  | 1.76    | 300.92  | 160.56  | 336.38  | 267.92  | 247.35  |
| $\langle S_0 S_1   \hat{H}   AC \rangle$      | 227.82                                      | -28.79  | 292.80  | 296.07  | 269.56  | 349.73  | 377.24  | -70.12  | 376.07  | 344.07  |
| $\langle S_1 S_0   \hat{H}   CA \rangle$      | -230.95                                     | 45.22   | -310.01 | -296.31 | -312.63 | -309.86 | -344.60 | 79.41   | -403.15 | -346.57 |
| $\langle S_1 S_0   \hat{H}   AC \rangle$      | -289.72                                     | -300.87 | -324.84 | -383.52 | -0.67   | -280.22 | -161.97 | -340.37 | -261.98 | -228.46 |
| $\langle S_0 S_1   \hat{H}   TT \rangle$      | -2.89                                       | 3.96    | 1.88    | 1.16    | 2.79    | -0.68   | -0.22   | 3.88    | -7.15   | 8.82    |
| $\langle S_1 S_0   \hat{H}   TT \rangle$      | 0.92                                        | -2.39   | 1.29    | 3.51    | 0.05    | -7.64   | 1.31    | 1.79    | -9.76   | -0.07   |
| $\langle CA   \hat{H}   TT \rangle$           | -77.23                                      | -130.80 | 68.73   | -15.60  | -27.58  | 90.95   | -0.07   | -113.39 | -9.96   | -13.52  |
| $\langle AC   \hat{H}   TT \rangle$           | 101.96                                      | -1.01   | -95.46  | -10.06  | 108.67  | -43.00  | 37.82   | -24.93  | 31.37   | 192.52  |
| $\langle S_0 S_1   \hat{H}   S_0 S_1 \rangle$ | 2.74                                        | 2.93    | 2.80    | 2.75    | 2.78    | 2.88    | 2.96    | 2.88    | 2.81    | 2.66    |
| $\langle S_1 S_0   \hat{H}   S_1 S_0 \rangle$ | 3.13                                        | 2.96    | 2.83    | 2.76    | 3.03    | 2.96    | 2.90    | 2.94    | 3.02    | 2.67    |
| $\langle CA   \hat{H}   CA \rangle$           | 3.04                                        | 3.15    | 2.89    | 2.87    | 3.03    | 3.09    | 3.10    | 3.06    | 2.96    | 2.61    |
| $\langle AC   \hat{H}   AC \rangle$           | 3.12                                        | 3.10    | 2.85    | 2.91    | 2.89    | 3.03    | 3.13    | 3.11    | 2.94    | 2.78    |
| $\langle TT   \hat{H}   TT \rangle$           | 2.03                                        | 2.02    | 1.70    | 1.77    | 1.83    | 2.09    | 2.09    | 1.91    | 1.89    | 1.27    |
| $ V_{\text{eff}10} ^2$<br>(variance)          | $1.03 \times 10^{-3} (2.68 \times 10^{-6})$ |         |         |         |         |         |         |         |         |         |
| $\tau$                                        | 103.8                                       |         |         |         |         |         |         |         |         |         |
| $ V_{\text{eff}S} ^2$<br>(variance)           | $1.23 \times 10^{-3} (3.50 \times 10^{-6})$ |         |         |         |         |         |         |         |         |         |
| $\tau_S$                                      | 86.8                                        |         |         |         |         |         |         |         |         |         |
| <b>BPC9</b>                                   |                                             |         |         |         |         |         |         |         |         |         |
| $\langle S_0 S_1   \hat{H}   CA \rangle$      | 346.89                                      | 182.98  | 366.98  | 318.94  | 235.88  | 36.89   | 309.97  | 334.25  | 284.11  | 288.21  |
| $\langle S_0 S_1   \hat{H}   AC \rangle$      | 212.58                                      | 78.74   | -32.32  | 83.37   | -178.20 | -263.29 | 43.52   | 11.64   | -118.03 | 145.60  |
| $\langle S_1 S_0   \hat{H}   CA \rangle$      | -234.27                                     | -81.33  | 57.04   | -79.56  | 158.80  | 261.02  | -31.79  | 18.81   | 148.26  | -144.09 |
| $\langle S_1 S_0   \hat{H}   AC \rangle$      | -344.41                                     | -180.04 | -383.74 | -329.88 | -246.28 | -46.54  | -320.10 | -332.49 | -255.00 | -312.33 |
| $\langle S_0 S_1   \hat{H}   TT \rangle$      | 4.73                                        | -0.19   | 0.67    | -0.66   | -1.23   | 0.73    | -6.62   | -2.20   | -1.79   | 1.15    |
| $\langle S_1 S_0   \hat{H}   TT \rangle$      | -3.62                                       | -1.81   | -2.60   | -3.14   | 0.31    | -6.10   | -5.04   | -0.05   | 3.66    | 2.05    |
| $\langle CA   \hat{H}   TT \rangle$           | 15.54                                       | -33.07  | -108.04 | 50.59   | 38.07   | -53.06  | 133.43  | -5.62   | 162.87  | -84.11  |
| $\langle AC   \hat{H}   TT \rangle$           | 2.25                                        | -31.22  | 6.44    | -164.72 | 60.74   | -125.12 | -103.60 | 140.59  | 84.56   | 32.19   |
| $\langle S_0 S_1   \hat{H}   S_0 S_1 \rangle$ | 2.80                                        | 2.68    | 2.76    | 2.79    | 2.69    | 2.62    | 2.78    | 2.70    | 2.66    | 2.86    |
| $\langle S_1 S_0   \hat{H}   S_1 S_0 \rangle$ | 2.49                                        | 2.94    | 2.83    | 2.75    | 2.78    | 2.63    | 2.98    | 2.85    | 3.01    | 2.85    |
| $\langle CA   \hat{H}   CA \rangle$           | 2.83                                        | 3.08    | 2.89    | 2.99    | 2.93    | 2.93    | 3.07    | 2.99    | 2.91    | 2.98    |
| $\langle AC   \hat{H}   AC \rangle$           | 2.60                                        | 3.11    | 2.81    | 2.73    | 2.93    | 2.95    | 3.19    | 2.82    | 2.98    | 3.10    |
| $\langle TT   \hat{H}   TT \rangle$           | 1.09                                        | 1.35    | 1.21    | 1.03    | 1.13    | 1.09    | 1.32    | 1.16    | 1.38    | 1.58    |
| $ V_{\text{eff}10} ^2$<br>(variance)          | $7.08 \times 10^{-4} (9.54 \times 10^{-7})$ |         |         |         |         |         |         |         |         |         |
| $\tau$                                        | 150.9                                       |         |         |         |         |         |         |         |         |         |
| $ V_{\text{eff}S} ^2$<br>(variance)           | $5.49 \times 10^{-4} (2.35 \times 10^{-7})$ |         |         |         |         |         |         |         |         |         |
| $\tau_S$                                      | 194.8                                       |         |         |         |         |         |         |         |         |         |



| <b>BPc10</b>                                  |                                                |         |         |         |         |         |         |         |         |         |
|-----------------------------------------------|------------------------------------------------|---------|---------|---------|---------|---------|---------|---------|---------|---------|
| $\langle S_0 S_1   \hat{H}   CA \rangle$      | 29.33                                          | 66.97   | -61.75  | -53.39  | -85.49  | -12.81  | 99.63   | 50.18   | 36.15   | -11.32  |
| $\langle S_0 S_1   \hat{H}   AC \rangle$      | 146.42                                         | -85.09  | -195.06 | -119.10 | 158.48  | -157.34 | 75.07   | -199.74 | -101.86 | -75.22  |
| $\langle S_1 S_0   \hat{H}   CA \rangle$      | -133.59                                        | 88.82   | 185.44  | 124.71  | -143.80 | 116.95  | -82.39  | 212.57  | 100.99  | 67.74   |
| $\langle S_1 S_0   \hat{H}   AC \rangle$      | -21.46                                         | -60.88  | 37.24   | 76.98   | 75.24   | -2.56   | -116.44 | -75.84  | -76.95  | -6.48   |
| $\langle S_0 S_1   \hat{H}   TT \rangle$      | 5.93                                           | -1.40   | 2.49    | 2.98    | -6.56   | 0.84    | 0.82    | -6.19   | 4.94    | 2.58    |
| $\langle S_1 S_0   \hat{H}   TT \rangle$      | -0.55                                          | 1.15    | -2.46   | -3.20   | 5.55    | 1.15    | 0.61    | 1.27    | -1.52   | -2.42   |
| $\langle CA   \hat{H}   TT \rangle$           | 62.05                                          | 76.12   | 25.56   | 90.64   | -157.45 | -82.17  | 16.06   | 72.33   | -178.73 | 10.00   |
| $\langle AC   \hat{H}   TT \rangle$           | 20.70                                          | 83.59   | -5.86   | -62.79  | -140.78 | -4.14   | 0.54    | 54.61   | 50.69   | -37.56  |
| $\langle S_0 S_1   \hat{H}   S_0 S_1 \rangle$ | 2.79                                           | 3.03    | 2.87    | 2.85    | 2.59    | 2.97    | 2.93    | 2.84    | 2.85    | 2.94    |
| $\langle S_1 S_0   \hat{H}   S_1 S_0 \rangle$ | 3.15                                           | 2.76    | 3.16    | 2.79    | 2.84    | 2.63    | 2.78    | 3.26    | 2.95    | 2.95    |
| $\langle CA   \hat{H}   CA \rangle$           | 3.05                                           | 3.04    | 3.13    | 2.93    | 2.88    | 3.07    | 3.11    | 3.15    | 3.23    | 3.24    |
| $\langle AC   \hat{H}   AC \rangle$           | 3.22                                           | 3.17    | 2.97    | 2.78    | 2.80    | 3.11    | 3.09    | 3.29    | 2.96    | 3.10    |
| $\langle TT   \hat{H}   TT \rangle$           | 2.10                                           | 1.79    | 2.05    | 1.68    | 1.45    | 1.57    | 1.66    | 2.31    | 2.07    | 2.20    |
| $ V_{\text{eff}10} ^2$<br>(variance)          | 1.71×10 <sup>-4</sup> (9.77×10 <sup>-8</sup> ) |         |         |         |         |         |         |         |         |         |
| $\tau$                                        | 624.9                                          |         |         |         |         |         |         |         |         |         |
| $ V_{\text{eff}5} ^2$<br>(variance)           | 3.98×10 <sup>-5</sup> (1.42×10 <sup>-9</sup> ) |         |         |         |         |         |         |         |         |         |
| $\tau_s$                                      | 2688.2                                         |         |         |         |         |         |         |         |         |         |
| <b>BPc11</b>                                  |                                                |         |         |         |         |         |         |         |         |         |
| $\langle S_0 S_1   \hat{H}   CA \rangle$      | 34.22                                          | 55.95   | 153.53  | 117.55  | 84.45   | 20.15   | -71.14  | 157.04  | 79.03   | 52.88   |
| $\langle S_0 S_1   \hat{H}   AC \rangle$      | -44.03                                         | -7.31   | -224.02 | -237.38 | -181.42 | 190.67  | -33.91  | -122.01 | -161.68 | -124.71 |
| $\langle S_1 S_0   \hat{H}   CA \rangle$      | 36.08                                          | 21.95   | 214.96  | 248.11  | 177.05  | -170.39 | 5.48    | 144.67  | 181.92  | 144.79  |
| $\langle S_1 S_0   \hat{H}   AC \rangle$      | -48.68                                         | -54.46  | -131.03 | -110.99 | -75.37  | 9.22    | 48.54   | -149.83 | -80.47  | -30.69  |
| $\langle S_0 S_1   \hat{H}   TT \rangle$      | 0.13                                           | -1.04   | 1.33    | 0.49    | -1.36   | 8.84    | 2.41    | -1.84   | 0.38    | -1.47   |
| $\langle S_1 S_0   \hat{H}   TT \rangle$      | -2.20                                          | 3.67    | -2.14   | 1.41    | 2.82    | -3.21   | 5.43    | 3.25    | -1.49   | 3.26    |
| $\langle CA   \hat{H}   TT \rangle$           | -22.91                                         | 14.88   | -121.59 | 131.97  | 71.59   | 166.08  | -65.33  | 148.73  | -71.80  | -18.79  |
| $\langle AC   \hat{H}   TT \rangle$           | 15.61                                          | 22.53   | -220.44 | 144.61  | 77.45   | 35.50   | -49.93  | 174.96  | -166.81 | 119.13  |
| $\langle S_0 S_1   \hat{H}   S_0 S_1 \rangle$ | 2.87                                           | 2.82    | 2.92    | 2.95    | 3.11    | 2.98    | 2.89    | 2.91    | 2.75    | 2.84    |
| $\langle S_1 S_0   \hat{H}   S_1 S_0 \rangle$ | 2.87                                           | 2.80    | 3.03    | 3.00    | 2.88    | 2.94    | 2.91    | 2.99    | 2.77    | 2.88    |
| $\langle CA   \hat{H}   CA \rangle$           | 3.11                                           | 2.92    | 3.20    | 3.26    | 3.21    | 3.10    | 3.02    | 3.17    | 2.92    | 2.91    |
| $\langle AC   \hat{H}   AC \rangle$           | 3.03                                           | 2.94    | 3.15    | 2.99    | 3.06    | 3.02    | 3.03    | 3.17    | 2.90    | 3.06    |
| $\langle TT   \hat{H}   TT \rangle$           | 1.75                                           | 1.57    | 2.00    | 1.98    | 2.02    | 1.92    | 1.94    | 1.99    | 1.26    | 1.71    |
| $ V_{\text{eff}10} ^2$<br>(variance)          | 3.33×10 <sup>-4</sup> (2.66×10 <sup>-7</sup> ) |         |         |         |         |         |         |         |         |         |
| $\tau$                                        | 320.9                                          |         |         |         |         |         |         |         |         |         |
| $ V_{\text{eff}5} ^2$<br>(variance)           | 4.07×10 <sup>-4</sup> (2.46×10 <sup>-7</sup> ) |         |         |         |         |         |         |         |         |         |
| $\tau_s$                                      | 262.9                                          |         |         |         |         |         |         |         |         |         |
| <b>BPc12</b>                                  |                                                |         |         |         |         |         |         |         |         |         |
| $\langle S_0 S_1   \hat{H}   CA \rangle$      | 320.48                                         | 144.98  | 331.49  | 283.57  | 350.94  | 283.73  | 120.80  | 292.14  | 364.64  | 213.92  |
| $\langle S_0 S_1   \hat{H}   AC \rangle$      | 219.00                                         | 366.30  | 270.06  | 175.41  | 176.26  | 274.20  | 233.01  | 271.46  | 282.81  | 302.36  |
| $\langle S_1 S_0   \hat{H}   CA \rangle$      | -209.51                                        | -357.12 | -289.71 | -137.60 | -191.98 | -272.28 | -260.42 | -301.57 | -229.86 | -312.05 |
| $\langle S_1 S_0   \hat{H}   AC \rangle$      | -316.11                                        | -141.81 | -333.90 | -283.45 | -371.18 | -297.63 | -136.70 | -325.39 | -323.84 | -193.24 |
| $\langle S_0 S_1   \hat{H}   TT \rangle$      | 3.10                                           | -1.12   | -0.53   | 2.76    | 1.17    | -1.51   | 3.54    | 1.83    | 4.82    | 1.74    |
| $\langle S_1 S_0   \hat{H}   TT \rangle$      | -0.29                                          | -2.63   | 2.08    | 7.33    | 1.87    | 4.83    | -1.26   | 0.02    | 3.01    | 1.41    |
| $\langle CA   \hat{H}   TT \rangle$           | -62.98                                         | 54.40   | 17.72   | 17.45   | -96.95  | -73.20  | -6.67   | 20.30   | 17.37   | 40.19   |
| $\langle AC   \hat{H}   TT \rangle$           | -32.18                                         | -85.80  | -48.11  | -44.65  | 54.23   | 120.66  | 43.95   | -125.08 | 51.68   | -75.06  |
| $\langle S_0 S_1   \hat{H}   S_0 S_1 \rangle$ | 2.94                                           | 2.78    | 2.81    | 3.06    | 2.88    | 2.92    | 2.93    | 2.71    | 2.88    | 2.90    |
| $\langle S_1 S_0   \hat{H}   S_1 S_0 \rangle$ | 2.97                                           | 3.03    | 2.90    | 2.93    | 2.80    | 2.98    | 2.89    | 3.02    | 2.83    | 2.90    |
| $\langle CA   \hat{H}   CA \rangle$           | 3.00                                           | 3.00    | 2.92    | 3.19    | 2.87    | 3.20    | 3.19    | 2.86    | 2.87    | 3.04    |
| $\langle AC   \hat{H}   AC \rangle$           | 3.16                                           | 3.03    | 2.91    | 3.17    | 3.03    | 3.05    | 2.98    | 3.14    | 3.11    | 2.99    |

|                                         |                                                |         |         |         |         |         |         |         |         |         |
|-----------------------------------------|------------------------------------------------|---------|---------|---------|---------|---------|---------|---------|---------|---------|
| $\langle TT \hat{H} TT\rangle$          | 2.04                                           | 1.97    | 1.67    | 2.20    | 1.72    | 2.10    | 1.97    | 1.91    | 1.96    | 1.86    |
| $ V_{\text{eff}} _{10}^2$<br>(variance) | 9.14 $\times 10^{-4}$ (1.11 $\times 10^{-6}$ ) |         |         |         |         |         |         |         |         |         |
| $\tau$                                  | 116.9                                          |         |         |         |         |         |         |         |         |         |
| $ V_{\text{eff}} _S^2$<br>(variance)    | 1.08 $\times 10^{-3}$ (1.31 $\times 10^{-6}$ ) |         |         |         |         |         |         |         |         |         |
| $\tau_S$                                | 99.4                                           |         |         |         |         |         |         |         |         |         |
| <b>BPc13</b>                            |                                                |         |         |         |         |         |         |         |         |         |
| $\langle S_0S_1 \hat{H} CA\rangle$      | 422.43                                         | -240.95 | 347.12  | -351.85 | -80.78  | 4.21    | -163.07 | -345.87 | 126.85  | 271.88  |
| $\langle S_0S_1 \hat{H} AC\rangle$      | 367.84                                         | -378.75 | 388.22  | -454.40 | -283.76 | -94.90  | -306.14 | -295.13 | 72.18   | 260.91  |
| $\langle S_1S_0 \hat{H} CA\rangle$      | -367.35                                        | 377.73  | -377.41 | 475.34  | 262.13  | 88.80   | 324.33  | 280.60  | -78.23  | -266.75 |
| $\langle S_1S_0 \hat{H} AC\rangle$      | -424.75                                        | 250.13  | -336.08 | 346.78  | 82.90   | -13.29  | 170.46  | 320.60  | -134.43 | -249.32 |
| $\langle S_0S_1 \hat{H} TT\rangle$      | -0.12                                          | -4.04   | 2.84    | -4.53   | 4.41    | -6.47   | -0.02   | 0.70    | 6.29    | -1.57   |
| $\langle S_1S_0 \hat{H} TT\rangle$      | 0.88                                           | -3.04   | 5.98    | -7.87   | -2.68   | 4.11    | -7.23   | -0.71   | -4.30   | 8.49    |
| $\langle CA \hat{H} TT\rangle$          | 132.66                                         | -107.90 | -386.23 | -143.03 | 9.74    | -31.60  | -277.23 | -110.89 | -343.88 | -67.61  |
| $\langle AC \hat{H} TT\rangle$          | -248.36                                        | 86.43   | 264.66  | 116.87  | -149.18 | 91.71   | 292.47  | 81.36   | 263.53  | 223.10  |
| $\langle S_0S_1 \hat{H} S_0S_1\rangle$  | 2.79                                           | 2.95    | 2.95    | 2.87    | 3.06    | 2.91    | 3.10    | 2.89    | 2.78    | 2.85    |
| $\langle S_1S_0 \hat{H} S_1S_0\rangle$  | 3.04                                           | 2.84    | 2.97    | 2.89    | 2.96    | 2.92    | 2.93    | 2.73    | 2.92    | 3.04    |
| $\langle CA \hat{H} CA\rangle$          | 2.66                                           | 2.77    | 2.76    | 2.74    | 2.84    | 2.74    | 2.90    | 2.88    | 2.64    | 2.59    |
| $\langle AC \hat{H} AC\rangle$          | 2.57                                           | 2.74    | 2.79    | 2.66    | 2.92    | 2.74    | 2.85    | 2.65    | 2.67    | 2.88    |
| $\langle TT \hat{H} TT\rangle$          | 1.91                                           | 1.78    | 2.04    | 1.55    | 2.04    | 1.81    | 2.13    | 1.56    | 1.80    | 1.85    |
| $ V_{\text{eff}} _{10}^2$<br>(variance) | 1.68 $\times 10^{-2}$ (1.27 $\times 10^{-3}$ ) |         |         |         |         |         |         |         |         |         |
| $\tau$                                  | 6.4                                            |         |         |         |         |         |         |         |         |         |
| $ V_{\text{eff}} _S^2$<br>(variance)    | 6.40 $\times 10^{-3}$ (7.90 $\times 10^{-5}$ ) |         |         |         |         |         |         |         |         |         |
| $\tau_S$                                | 16.7                                           |         |         |         |         |         |         |         |         |         |
| <b>BPc14</b>                            |                                                |         |         |         |         |         |         |         |         |         |
| $\langle S_0S_1 \hat{H} CA\rangle$      | -92.39                                         | -80.45  | 22.75   | -206.98 | -227.74 | -154.33 | -112.21 | -141.53 | -109.48 | -117.63 |
| $\langle S_0S_1 \hat{H} AC\rangle$      | 265.33                                         | 206.66  | 442.11  | 138.81  | 121.12  | 274.28  | 324.52  | 221.82  | 168.46  | 272.70  |
| $\langle S_1S_0 \hat{H} CA\rangle$      | -254.84                                        | -213.66 | -446.17 | -131.51 | -110.13 | -281.35 | -298.06 | -234.42 | -186.38 | -273.81 |
| $\langle S_1S_0 \hat{H} AC\rangle$      | 99.61                                          | 61.26   | -37.24  | 213.99  | 250.62  | 158.78  | 136.46  | 111.98  | 108.70  | 129.00  |
| $\langle S_0S_1 \hat{H} TT\rangle$      | -6.33                                          | 3.19    | 1.27    | -1.36   | -2.93   | 1.49    | -2.71   | 3.08    | 3.64    | -1.11   |
| $\langle S_1S_0 \hat{H} TT\rangle$      | 2.12                                           | -1.93   | 1.72    | 1.09    | 1.86    | -5.70   | 3.52    | -6.05   | -3.93   | 3.18    |
| $\langle CA \hat{H} TT\rangle$          | -145.11                                        | 147.04  | 55.29   | -196.68 | -158.01 | 0.23    | 99.53   | 55.38   | 136.45  | 66.62   |
| $\langle AC \hat{H} TT\rangle$          | 98.17                                          | -87.94  | -44.35  | 75.40   | -82.67  | 78.91   | -105.85 | 103.79  | -73.07  | -85.01  |
| $\langle S_0S_1 \hat{H} S_0S_1\rangle$  | 2.91                                           | 2.80    | 3.13    | 2.85    | 2.90    | 3.14    | 3.46    | 2.93    | 2.80    | 3.18    |
| $\langle S_1S_0 \hat{H} S_1S_0\rangle$  | 3.11                                           | 3.37    | 2.94    | 3.03    | 3.21    | 3.04    | 2.79    | 3.07    | 3.16    | 2.89    |
| $\langle CA \hat{H} CA\rangle$          | 3.04                                           | 3.15    | 3.03    | 2.88    | 3.10    | 3.05    | 3.18    | 2.97    | 3.11    | 3.02    |
| $\langle AC \hat{H} AC\rangle$          | 2.98                                           | 3.16    | 3.00    | 2.86    | 3.00    | 3.22    | 3.15    | 3.21    | 3.01    | 2.97    |
| $\langle TT \hat{H} TT\rangle$          | 1.93                                           | 2.18    | 2.19    | 1.83    | 2.11    | 2.24    | 2.25    | 2.00    | 1.95    | 2.02    |
| $ V_{\text{eff}} _{10}^2$<br>(variance) | 4.88 $\times 10^{-3}$ (2.30 $\times 10^{-5}$ ) |         |         |         |         |         |         |         |         |         |
| $\tau$                                  | 21.9                                           |         |         |         |         |         |         |         |         |         |
| $ V_{\text{eff}} _S^2$<br>(variance)    | 8.12 $\times 10^{-4}$ (5.90 $\times 10^{-7}$ ) |         |         |         |         |         |         |         |         |         |
| $\tau_S$                                | 131.7                                          |         |         |         |         |         |         |         |         |         |
| <b>BPc15</b>                            |                                                |         |         |         |         |         |         |         |         |         |
| $\langle S_0S_1 \hat{H} CA\rangle$      | -306.69                                        | -16.71  | -242.55 | -248.95 | -20.79  | -292.27 | -295.87 | 190.66  | -211.29 | -299.92 |
| $\langle S_0S_1 \hat{H} AC\rangle$      | -100.74                                        | 350.43  | 80.76   | 97.68   | 333.41  | 5.74    | -365.07 | 415.09  | 159.52  | 109.35  |
| $\langle S_1S_0 \hat{H} CA\rangle$      | 154.67                                         | -362.53 | -64.11  | -120.58 | -341.28 | -26.66  | 343.32  | -377.04 | -148.15 | -74.07  |
| $\langle S_1S_0 \hat{H} AC\rangle$      | 330.22                                         | -6.96   | 243.63  | 218.83  | 21.93   | 279.92  | 247.94  | -154.93 | 205.27  | 267.51  |
| $\langle S_0S_1 \hat{H} TT\rangle$      | 1.97                                           | 1.40    | -7.39   | -0.14   | 0.33    | -0.72   | -0.90   | 8.32    | -3.22   | -3.68   |
| $\langle S_1S_0 \hat{H} TT\rangle$      | 1.66                                           | -6.08   | 6.09    | 6.18    | 0.84    | 1.77    | -5.47   | 5.56    | 1.94    | 4.65    |

|                                         |         |         |         |         |         |         |         |         |         |                                               |
|-----------------------------------------|---------|---------|---------|---------|---------|---------|---------|---------|---------|-----------------------------------------------|
| $\langle CA \hat{H} TT\rangle$          | 149.64  | 25.14   | 36.94   | 116.72  | -79.18  | -11.47  | -77.42  | 97.58   | -95.42  | -88.22                                        |
| $\langle AC \hat{H} TT\rangle$          | -103.88 | -47.82  | -206.97 | -244.43 | 46.94   | -90.19  | 84.98   | -35.27  | -22.88  | -129.23                                       |
| $\langle S_0S_1 \hat{H} S_0S_1\rangle$  | 2.94    | 2.85    | 3.00    | 3.09    | 3.00    | 3.12    | 3.06    | 3.15    | 2.94    | 2.84                                          |
| $\langle S_1S_0 \hat{H} S_1S_0\rangle$  | 3.25    | 3.17    | 3.28    | 3.27    | 3.57    | 3.02    | 2.69    | 2.72    | 3.21    | 3.30                                          |
| $\langle CA \hat{H} CA\rangle$          | 3.13    | 3.05    | 3.13    | 3.20    | 3.49    | 3.14    | 2.85    | 3.01    | 3.10    | 3.16                                          |
| $\langle AC \hat{H} AC\rangle$          | 3.09    | 3.08    | 3.04    | 3.26    | 3.35    | 3.14    | 2.93    | 3.08    | 3.16    | 3.08                                          |
| $\langle TT \hat{H} TT\rangle$          | 2.26    | 2.06    | 2.20    | 2.53    | 2.84    | 2.04    | 1.72    | 2.00    | 2.27    | 2.18                                          |
| $ V_{\text{eff}} _{10}^2$<br>(variance) |         |         |         |         |         |         |         |         |         | $6.29\times 10^{-3}$ ( $1.24\times 10^{-4}$ ) |
| $\tau$                                  |         |         |         |         |         |         |         |         |         | 17.0                                          |
| $ V_{\text{eff}} _S^2$<br>(variance)    |         |         |         |         |         |         |         |         |         | $8.11\times 10^{-4}$ ( $4.91\times 10^{-7}$ ) |
| $\tau_S$                                |         |         |         |         |         |         |         |         |         | 131.8                                         |
| <b>BPc16</b>                            |         |         |         |         |         |         |         |         |         |                                               |
| $\langle S_0S_1 \hat{H} CA\rangle$      | -33.80  | -9.73   | 36.92   | 125.19  | -109.43 | 93.55   | 83.04   | -1.67   | 91.15   | -83.23                                        |
| $\langle S_0S_1 \hat{H} AC\rangle$      | 259.73  | 276.79  | 251.54  | -4.92   | 317.10  | 72.75   | 283.81  | 268.31  | 214.89  | 156.71                                        |
| $\langle S_1S_0 \hat{H} CA\rangle$      | -259.37 | -274.38 | -231.70 | 12.97   | -334.98 | -53.25  | -258.89 | -256.59 | -175.75 | -122.67                                       |
| $\langle S_1S_0 \hat{H} AC\rangle$      | 39.86   | -0.74   | 6.11    | -106.59 | 124.33  | -102.30 | -54.48  | -2.04   | -81.17  | 53.19                                         |
| $\langle S_0S_1 \hat{H} TT\rangle$      | 2.75    | -1.86   | 1.28    | 2.70    | 5.01    | 7.67    | 2.93    | 0.00    | -4.96   | -3.32                                         |
| $\langle S_1S_0 \hat{H} TT\rangle$      | -1.74   | 1.86    | -4.84   | -4.87   | -5.84   | 1.85    | 1.79    | 0.87    | -3.61   | 4.52                                          |
| $\langle CA \hat{H} TT\rangle$          | -107.02 | -206.97 | -188.64 | 43.71   | -291.99 | -30.47  | 131.94  | 109.85  | -121.11 | -60.59                                        |
| $\langle AC \hat{H} TT\rangle$          | -230.54 | -85.43  | -51.04  | -152.11 | -307.81 | 20.69   | 120.83  | 208.63  | -61.16  | -156.47                                       |
| $\langle S_0S_1 \hat{H} S_0S_1\rangle$  | 2.81    | 3.00    | 2.80    | 2.65    | 2.82    | 2.82    | 2.85    | 2.85    | 3.04    | 2.87                                          |
| $\langle S_1S_0 \hat{H} S_1S_0\rangle$  | 2.85    | 2.88    | 2.77    | 2.80    | 2.93    | 2.89    | 2.83    | 2.89    | 2.92    | 2.95                                          |
| $\langle CA \hat{H} CA\rangle$          | 3.04    | 3.01    | 3.04    | 2.82    | 3.08    | 2.84    | 3.04    | 2.86    | 2.97    | 3.05                                          |
| $\langle AC \hat{H} AC\rangle$          | 2.96    | 3.13    | 2.96    | 2.87    | 3.04    | 2.98    | 2.91    | 3.07    | 3.36    | 2.99                                          |
| $\langle TT \hat{H} TT\rangle$          | 1.60    | 1.76    | 1.59    | 1.37    | 1.83    | 1.73    | 1.73    | 1.63    | 2.12    | 1.76                                          |
| $ V_{\text{eff}} _{10}^2$<br>(variance) |         |         |         |         |         |         |         |         |         | $2.71\times 10^{-3}$ ( $7.77\times 10^{-6}$ ) |
| $\tau$                                  |         |         |         |         |         |         |         |         |         | 39.5                                          |
| $ V_{\text{eff}} _S^2$<br>(variance)    |         |         |         |         |         |         |         |         |         | $4.31\times 10^{-3}$ ( $1.50\times 10^{-5}$ ) |
| $\tau_S$                                |         |         |         |         |         |         |         |         |         | 24.8                                          |
| <b>BPc17</b>                            |         |         |         |         |         |         |         |         |         |                                               |
| $\langle S_0S_1 \hat{H} CA\rangle$      | 414.19  | 381.76  | 298.93  | 212.23  | 384.56  | 253.79  | 290.38  | 217.95  | 318.84  | 254.58                                        |
| $\langle S_0S_1 \hat{H} AC\rangle$      | 201.40  | 296.90  | 285.19  | 290.12  | 231.95  | 358.05  | 285.85  | 326.13  | 294.39  | 290.65                                        |
| $\langle S_1S_0 \hat{H} CA\rangle$      | -208.34 | -320.34 | -320.45 | -322.99 | -222.76 | -334.94 | -260.73 | -328.24 | -324.69 | -278.03                                       |
| $\langle S_1S_0 \hat{H} AC\rangle$      | -429.29 | -402.03 | -331.70 | -238.07 | -345.05 | -229.11 | -308.80 | -210.45 | -353.08 | -247.93                                       |
| $\langle S_0S_1 \hat{H} TT\rangle$      | 1.75    | -4.38   | 2.31    | -0.46   | 0.04    | -2.01   | 4.51    | -0.24   | 2.60    | -7.46                                         |
| $\langle S_1S_0 \hat{H} TT\rangle$      | -0.76   | -2.26   | 0.81    | 1.56    | -0.28   | 4.26    | -4.08   | 6.46    | 0.47    | -1.14                                         |
| $\langle CA \hat{H} TT\rangle$          | -87.97  | 4.26    | -97.54  | 27.11   | 65.13   | 69.98   | -72.66  | -61.67  | 1.37    | -63.74                                        |
| $\langle AC \hat{H} TT\rangle$          | 37.18   | -100.02 | 44.91   | 29.75   | -70.65  | -111.77 | 18.37   | -15.60  | 52.26   | -12.49                                        |
| $\langle S_0S_1 \hat{H} S_0S_1\rangle$  | 2.77    | 2.72    | 2.77    | 2.86    | 2.90    | 2.94    | 2.80    | 2.73    | 3.00    | 2.89                                          |
| $\langle S_1S_0 \hat{H} S_1S_0\rangle$  | 3.07    | 2.79    | 2.92    | 2.94    | 2.85    | 2.85    | 2.91    | 2.83    | 3.07    | 2.80                                          |
| $\langle CA \hat{H} CA\rangle$          | 3.05    | 2.92    | 2.90    | 2.99    | 2.97    | 2.96    | 2.86    | 2.82    | 3.20    | 3.00                                          |
| $\langle AC \hat{H} AC\rangle$          | 3.16    | 2.84    | 3.11    | 3.02    | 3.08    | 2.93    | 3.02    | 2.93    | 3.19    | 2.91                                          |
| $\langle TT \hat{H} TT\rangle$          | 2.12    | 1.91    | 1.86    | 1.88    | 1.88    | 1.93    | 1.87    | 1.65    | 2.46    | 1.71                                          |
| $ V_{\text{eff}} _{10}^2$<br>(variance) |         |         |         |         |         |         |         |         |         | $1.13\times 10^{-3}$ ( $1.50\times 10^{-6}$ ) |
| $\tau$                                  |         |         |         |         |         |         |         |         |         | 94.8                                          |
| $ V_{\text{eff}} _S^2$<br>(variance)    |         |         |         |         |         |         |         |         |         | $1.47\times 10^{-3}$ ( $1.70\times 10^{-6}$ ) |
| $\tau_S$                                |         |         |         |         |         |         |         |         |         | 73.0                                          |
| <b>BPc18</b>                            |         |         |         |         |         |         |         |         |         |                                               |

|                                               |         |         |         |         |         |         |         |         |         |                                                 |
|-----------------------------------------------|---------|---------|---------|---------|---------|---------|---------|---------|---------|-------------------------------------------------|
| $\langle S_0 S_1   \hat{H}   CA \rangle$      | 320.35  | 242.48  | 315.57  | 268.59  | 245.87  | 244.33  | 254.14  | 205.61  | 320.06  | 358.65                                          |
| $\langle S_0 S_1   \hat{H}   AC \rangle$      | 264.98  | 231.93  | 78.51   | 377.32  | 58.99   | -153.05 | -5.81   | -83.81  | -5.34   | 54.94                                           |
| $\langle S_1 S_0   \hat{H}   CA \rangle$      | -281.14 | -263.94 | -85.42  | -403.54 | -67.69  | 179.17  | 36.04   | 79.97   | -31.49  | -82.35                                          |
| $\langle S_1 S_0   \hat{H}   AC \rangle$      | -330.43 | -267.18 | -276.76 | -252.89 | -254.58 | -253.94 | -254.49 | -198.03 | -322.15 | -378.85                                         |
| $\langle S_0 S_1   \hat{H}   TT \rangle$      | -6.39   | 2.76    | 3.97    | -6.92   | 1.24    | 0.62    | -2.21   | 4.48    | 7.42    | 2.26                                            |
| $\langle S_1 S_0   \hat{H}   TT \rangle$      | -6.87   | 9.72    | -5.98   | -2.92   | 0.51    | -0.64   | -4.81   | -0.32   | 1.04    | 5.35                                            |
| $\langle CA   \hat{H}   TT \rangle$           | 84.51   | -19.68  | -66.18  | -92.79  | -32.52  | -39.93  | 16.79   | -112.94 | -59.81  | 83.70                                           |
| $\langle AC   \hat{H}   TT \rangle$           | -97.04  | 45.25   | -21.39  | 43.73   | -53.32  | -22.11  | -69.93  | -70.91  | 31.39   | 134.45                                          |
| $\langle S_0 S_1   \hat{H}   S_0 S_1 \rangle$ | 2.87    | 2.85    | 2.82    | 3.48    | 2.87    | 2.85    | 2.91    | 2.89    | 2.71    | 2.78                                            |
| $\langle S_1 S_0   \hat{H}   S_1 S_0 \rangle$ | 3.31    | 3.24    | 3.21    | 2.87    | 3.15    | 3.21    | 3.32    | 3.29    | 3.12    | 3.27                                            |
| $\langle CA   \hat{H}   CA \rangle$           | 3.24    | 3.32    | 3.17    | 3.33    | 3.33    | 3.58    | 3.48    | 3.41    | 3.17    | 3.25                                            |
| $\langle AC   \hat{H}   AC \rangle$           | 3.22    | 3.19    | 3.20    | 3.37    | 3.28    | 3.36    | 3.41    | 3.55    | 3.14    | 3.24                                            |
| $\langle TT   \hat{H}   TT \rangle$           | 2.43    | 2.35    | 2.09    | 2.83    | 1.97    | 2.11    | 2.42    | 2.28    | 1.95    | 2.15                                            |
| $ V_{\text{eff}} _{10}^2$<br>(variance)       |         |         |         |         |         |         |         |         |         | $1.34 \times 10^{-3}$ ( $7.45 \times 10^{-6}$ ) |
| $\tau$                                        |         |         |         |         |         |         |         |         |         | 80.0                                            |
| $ V_{\text{eff}} _S^2$<br>(variance)          |         |         |         |         |         |         |         |         |         | $1.02 \times 10^{-3}$ ( $1.68 \times 10^{-6}$ ) |
| $\tau_S$                                      |         |         |         |         |         |         |         |         |         | 105.2                                           |
| <b>BPc19</b>                                  |         |         |         |         |         |         |         |         |         |                                                 |
| $\langle S_0 S_1   \hat{H}   CA \rangle$      | 95.07   | -4.26   | 19.46   | 3.47    | 85.66   | 60.62   | 1.18    | 15.07   | -125.65 | -74.85                                          |
| $\langle S_0 S_1   \hat{H}   AC \rangle$      | 9.08    | 97.40   | 78.64   | -41.06  | 140.53  | 199.62  | 178.25  | 107.04  | 95.78   | 125.70                                          |
| $\langle S_1 S_0   \hat{H}   CA \rangle$      | -10.27  | -138.79 | -80.29  | 44.13   | -148.65 | -162.36 | -184.72 | -123.12 | -119.71 | -130.65                                         |
| $\langle S_1 S_0   \hat{H}   AC \rangle$      | -111.76 | 18.13   | -23.09  | 7.30    | -60.15  | -53.37  | 3.83    | -20.66  | 120.29  | 79.24                                           |
| $\langle S_0 S_1   \hat{H}   TT \rangle$      | 2.06    | -3.43   | -0.58   | -3.08   | 2.38    | 5.02    | -1.03   | -2.74   | 3.36    | 4.29                                            |
| $\langle S_1 S_0   \hat{H}   TT \rangle$      | -2.65   | 4.16    | 2.22    | 2.10    | -8.77   | -4.27   | 1.11    | 2.37    | -4.41   | -5.36                                           |
| $\langle CA   \hat{H}   TT \rangle$           | -14.60  | -127.47 | 18.94   | -17.25  | 109.62  | 165.57  | -129.68 | -44.99  | 140.20  | 96.90                                           |
| $\langle AC   \hat{H}   TT \rangle$           | -65.15  | -121.28 | -117.08 | 5.96    | 12.15   | 25.62   | -99.91  | -42.86  | 204.51  | 137.17                                          |
| $\langle S_0 S_1   \hat{H}   S_0 S_1 \rangle$ | 3.10    | 2.97    | 2.91    | 3.00    | 2.81    | 3.06    | 2.80    | 3.09    | 2.90    | 2.81                                            |
| $\langle S_1 S_0   \hat{H}   S_1 S_0 \rangle$ | 2.91    | 3.03    | 3.34    | 3.21    | 3.19    | 3.15    | 3.29    | 3.26    | 2.98    | 3.27                                            |
| $\langle CA   \hat{H}   CA \rangle$           | 3.37    | 3.37    | 3.45    | 3.56    | 3.26    | 3.31    | 3.39    | 3.57    | 3.49    | 3.45                                            |
| $\langle AC   \hat{H}   AC \rangle$           | 3.42    | 3.39    | 3.72    | 3.59    | 3.39    | 3.37    | 3.43    | 3.51    | 3.15    | 3.35                                            |
| $\langle TT   \hat{H}   TT \rangle$           | 2.22    | 2.11    | 2.32    | 2.47    | 2.20    | 2.22    | 2.12    | 2.43    | 1.89    | 2.24                                            |
| $ V_{\text{eff}} _{10}^2$<br>(variance)       |         |         |         |         |         |         |         |         |         | $2.24 \times 10^{-4}$ ( $1.41 \times 10^{-7}$ ) |
| $\tau$                                        |         |         |         |         |         |         |         |         |         | 476.3                                           |
| $ V_{\text{eff}} _S^2$<br>(variance)          |         |         |         |         |         |         |         |         |         | $2.25 \times 10^{-4}$ ( $8.42 \times 10^{-8}$ ) |
| $\tau_S$                                      |         |         |         |         |         |         |         |         |         | 474.7                                           |

## References

1. A. D. Platt, J. Day, S. Subramanian, J. E. Anthony and O. Ostroverkhova. *J. Phys. Chem. C*, 2009, **113**, 14006-14014.
2. B. J. Walker, A. J. Musser, D. Belijonne and R. H. Friend, *Nat. Chem.*, **2013**, 5, 1019-1024.
3. A. A. Bakulin, S. E. Morgan, T. B. Kehoe, M. W. Wilson, A. W. Chin, D. Zigmantas, D. Egorova and A. Rao, *Nat. Chem.*, 2016, **8**, 16–23.
4. T. Zeng, R. Hoffmann and N. Ananth, *J. Am. Chem. Soc.*, 2014, **136**, 5755–5764.
5. M. B. Smith and J. Michl, *Chem. Rev.*, 2010, **110**, 6891–6936.
